# Supplementary material for: Tangut, Gyalrongic, Kiranti and the nature of person indexation in Sino-Tibetan/Trans-Himalayan
Source: publisher site journal article supplement (doi:10.1515/lingvan-2015-0033), 2016-09-16
Supplement: Supplementary file 1 [file leilin.xls]

## Sheet: Sheet1
尢	3017	dji.j	1_61	類	03.01A.1	1	0
澳	3890	bo	1_49	林	03.01A.1	2	0
教	5865	so.	1_70	三	03.01A.1	3	0
壮	1290	tsew	2_38	第	03.01A.1	4	0
瑳	0608	thjɨ.	2_61	卷	03.01A.1	5	0
夙	0902	zjɨr	1_86	實	03.01A.2	1	0
毳	3744	dʑiej	2_31	信	03.01A.2	2	0
揃	1355	tjij	1_36	篇	03.01A.2	3	0
紳	1084	ɣa.	2_56	十	03.01A.2	4	0
袙	4962	.we	2_07	魏	03.01A.3	1	0
堋	2872	.wẽ	1_15	文	03.01A.3	2	0
揄	3379	xew	1_43	侯	03.01A.3	3	0
*					03.01A.3	4	0
修	0866	ɣu	1_04	吳	03.01A.3	5	0
蕀	4807	khji	1_11	起	03.01A.3	6	0
*					03.01A.3	7	0
忽	0576	kjwi	1_11	季	03.01A.3	8	0
窃	1208	tɕia	1_18	扎	03.01A.3	9	0
*					03.01A.3	10	0
桝	2259	miej	2_31	孟	03.01A.3	11	0
具	5925	tsə	1_27	子	03.01A.3	12	0
*					03.01A.3	13	0
階	5574	.wji	2_09	尾	03.01A.3	14	0
鮪	2256	ɕjəj	1_41	生	03.01A.3	15	0
悄	3213	tsjĩ	1_16	晉	03.01A.4	1	0
堋	2872	.wẽ	1_15	文	03.01A.4	2	0
毆	3738	kow	1_54	公	03.01A.4	3	0
*					03.01A.4	4	0
嬢	1034	kwo	1_19	郭	03.01A.4	5	0
瑟	4042	kjɨ.	2_61	伋	03.01A.4	6	0
*					03.01A.4	7	0
扶	2052	xiwã	1_25	范	03.01A.4	8	0
繖	4502	ɕjɨ	2_27	式	03.01A.4	9	0
袙	4962	.we	2_07	魏	03.01A.5	1	0
堋	2872	.wẽ	1_15	文	03.01A.5	2	0
揄	3379	xew	1_43	侯	03.01A.5	3	0
刮	2627	ljɨ.	2_61	地	03.01A.5	4	0
昴	3469	sjij	2_33	識	03.01A.5	5	0
衫	4950	rjir	2_72	P.	03.01A.5	6	0
壕	0558	njijr	1_74	野	03.01A.5	7	0
溪	3844	dʑji.j	1_61	行	03.01A.5	8	0
悗	3216	ljwu	2_03	聚	03.01A.5	9	0
嫉	0795	rjɨr	2_77	D1	03.01A.5	10	0
豕	5113	.wji	1_10	為1	03.01A.5	11	0
犧	3990	khjɨ	1_30	足	03.01A.5	12	0
萠	4762	tɕhjij	1_35	舉	03.01A.5	13	0
甚	1101	.jij	1_36	FUT	03.01A.5	14	0
賛	0705	zji.j	1_61	時	03.01A.5	15	0
攷	3431	dzju.	2_52	雨	03.01A.6	1	0
絛	4456	lji.j	2_54	大	03.01A.6	2	0
炭	1452	nja	1_20	D1	03.01A.6	3	0
友	2373	lji.j	2_54	來	03.01A.6	4	0
畑	1906	nioow	1_57	後	03.01A.6	5	0
繪	4507	ɕio	1_50	發	03.01A.6	6	0
假	2541	dzjwo	2_44	人	03.01A.6	7	0
子	0724	njɨ	2_28	等	03.01A.6	8	0
冂	2590	.wjɨ	2_27	D1	03.01A.6	9	0
甄	4069	pjwɨɨr	1_92	諫	03.01A.6	10	0
萄	1734	tji	1_11	勿	03.01A.6	11	0
縅	4481	ɕjɨ	1_29	往2	03.01A.6	12	0
肅	4601	nja	2_17	2SG	03.01A.6	13	0
組	1278	.jɨ	2_28	謂	03.01A.6	14	0
堋	2872	.wẽ	1_15	文	03.01A.6	15	0
揄	3379	xew	1_43	侯	03.01A.7	1	0
譲	1045	da.	2_56	曰	03.01A.7	2	0
假	2541	dzjwo	2_44	人	03.01A.7	3	0
衫	4950	rjir	2_72	P.	03.01A.7	4	0
悗	3216	ljwu	2_03	聚	03.01A.7	5	0
壇	1463	du	2_04	期	03.01A.7	6	0
嫉	0795	rjɨr	2_77	D1	03.01A.7	7	0
豕	5113	.wji	1_10	為1	03.01A.7	8	0
毳	3744	dʑiej	2_31	信	03.01A.7	9	0
阪	0649	ljwu	1_03	失	03.01A.7	10	0
鞄	5645	tji.	2_60	處	03.01A.7	11	0
好	0491	ljo.	2_64	豈	03.01A.7	12	0
僭	2562	.wjij	2_32	有	03.01A.7	13	0
組	1278	.jɨ	2_28	謂	03.01A.7	14	0
攷	3431	dzju.	2_52	雨	03.01A.7	15	0
倥	2529	pju.	2_52	帽	03.01B.1	1	0
焔	5449	tji.	1_67	置1	03.01B.1	2	0
仰	5880	ŋwu	2_01	而	03.01B.1	3	0
嫉	0795	rjɨr	2_77	D1	03.01B.1	4	0
綯	4469	ɕji	2_09	往1	03.01B.1	5	0
恍	3200	tɕhjiw	1_46	六	03.01B.1	6	0
妲	2937	lhji.j	0	國	03.01B.1	7	0
弋	3139	ɕjij	1_35	代	03.01B.1	8	0
假	2541	dzjwo	2_44	人	03.01B.1	9	0
攻	0508	ŋwu	2_01	是	03.01B.1	10	0
修	0866	ɣu	1_04	吳	03.01B.2	1	0
蕀	4807	khji	1_11	起	03.01B.2	2	0
褫	4989	.wjɨ.	1_67	朋	03.01B.2	3	0
蜿	4889	dʑjwɨ	1_30	友	03.01B.2	4	0
衫	4950	rjir	2_72	P.	03.01B.2	5	0
繩	4508	tji.	1_67	餐	03.01B.2	6	0
臘	4658	thji	1_11	飲	03.01B.2	7	0
悗	3216	ljwu	2_03	聚	03.01B.2	8	0
豕	5113	.wji	1_10	為1	03.01B.2	9	0
褫	4989	.wjɨ.	1_67	朋	03.01B.2	10	0
信	1064	mjij	2_33	未	03.01B.2	11	0
友	2373	lji.j	2_54	來	03.01B.2	12	0
郁	5354	thjɨ	2_28	此	03.01B.2	13	0
挧	3349	rjijr	2_68	P.	03.01B.2	14	0
修	0866	ɣu	1_04	吳	03.01B.2	15	0
蕀	4807	khji	1_11	起	03.01B.3	1	0
繩	4508	tji.	1_67	餐	03.01B.3	2	0
閥	1918	mji	1_11	不	03.01B.3	3	0
臘	4658	thji	1_11	飲	03.01B.3	4	1
臘	4658	thji	1_11	飲	03.01B.3	5	0
頼	2440	njɨɨ	2_29	日	03.01B.3	6	0
褫	4989	.wjɨ.	1_67	朋	03.01B.3	7	0
友	2373	lji.j	2_54	來	03.01B.3	8	0
杼	3527	mja	1_20	然	03.01B.3	9	0
畑	1906	nioow	1_57	後	03.01B.3	10	0
捩	3370	gu	2_01	共	03.01B.3	11	0
冂	2590	.wjɨ	2_27	D1	03.01B.3	12	0
臘	4658	thji	1_11	飲	03.01B.3	13	0
恍	3200	tɕhjiw	1_46	六	03.01B.3	14	0
妲	2937	lhji.j	0	國	03.01B.3	15	0
弋	3139	ɕjij	1_35	代	03.01B.4	1	0
假	2541	dzjwo	2_44	人	03.01B.4	2	0
攻	0508	ŋwu	2_01	是	03.01B.4	3	0
忽	0576	kjwi	1_11	季	03.01B.5	1	0
窃	1208	tɕia	1_18	扎	03.01B.5	2	0
楕	1374	tɕhjɨ	1_29	此	03.01B.5	3	0
蚌	4861	zjo.	2_64	時	03.01B.5	4	0
詮	1245	.jij	1_36	自	03.01B.5	5	0
妲	2937	lhji.j	0	國	03.01B.5	6	0
朿	3513	mə	1_27	天	03.01B.5	7	0
耶	2349	zjɨ.	1_69	子	03.01B.5	8	0
幃	3099	dʑjiij	1_39	居	03.01B.5	9	0
鞄	5645	tji.	2_60	處	03.01B.5	10	0
演	5447	do	2_42	P.	03.01B.5	11	0
嫉	0795	rjɨr	2_77	D1	03.01B.5	12	0
拶	0676	.wjij	1_35	往	03.01B.5	13	0
署	0942	lja.	1_64	北	03.01B.5	14	0
挧	3349	rjijr	2_68	P.	03.01B.5	15	0
遭	1326	kjɨ	1_30	D1	03.01B.6	1	0
豫	2474	rar	2_73	過	03.01B.6	2	0
墾	0586	sju	2_03	徐	03.01B.6	3	0
誅	5045	kjwĩ	1_16	君	03.01B.6	4	0
衫	4950	rjir	2_72	P.	03.01B.6	5	0
桂	5981	.a	0	D1	03.01B.6	6	0
賜	0756	dʑju	2_02	遇	03.01B.6	7	0
墾	0586	sju	2_03	徐	03.01B.6	8	0
誅	5045	kjwĩ	1_16	君	03.01B.6	9	0
忽	0576	kjwi	1_11	季	03.01B.6	10	0
窃	1208	tɕia	1_18	扎	03.01B.6	11	0
杉	1139	.jij	1_36	之	03.01B.6	12	0
茅	5655	ljɨ.	1_69	寶	03.01B.6	13	0
躋	5205	ɣa.	1_63	劒	03.01B.6	14	0
掬	0147	ɕjij	2_32	請	03.01B.6	15	0
搜	3357	kie.j	2_53	欲	03.01B.7	1	0
証	1014	ŋwuu	1_05	語	03.01B.7	2	0
借	0826	thjɨ	1_30	說	03.01B.7	3	0
椛	5643	mjɨ	1_30	不	03.01B.7	4	0
釘	1617	kjir	2_72	敢	03.01B.7	5	0
忽	0576	kjwi	1_11	季	03.01B.7	6	0
窃	1208	tɕia	1_18	扎	03.01B.7	7	0
梵	3574	tsjij	2_33	曉1	03.01B.7	8	0
俘	2518	njiij	1_39	心	03.01B.7	9	0
孤	0433	bju	1_03	P.	03.01B.7	10	0
桂	5981	.a	0	D1	03.01B.7	11	0
剩	2638	mjiij	2_35	許	03.01B.7	12	0
豕	5113	.wji	1_10	為1	03.01B.7	13	0
笄	4342	dja	2_17	D1	03.01B.7	14	0
佯	2511	rjɨr	2_77	去	03.01B.7	15	0
夛	2912	lhjwo	1_48	還	03.02A.1	1	0
畑	1906	nioow	1_57	後	03.02A.1	2	0
墾	0586	sju	2_03	徐	03.02A.1	3	0
誅	5045	kjwĩ	1_16	君	03.02A.1	4	0
笄	4342	dja	2_17	D1	03.02A.1	5	0
嶄	3072	sji	2_10	死1	03.02A.1	6	0
忽	0576	kjwi	1_11	季	03.02A.1	7	0
窃	1208	tɕia	1_18	扎	03.02A.1	8	0
蛇	0824	tɕhjɨ	2_27	立	03.02A.1	9	0
泳	5417	rjar	2_74	即	03.02A.1	10	0
茅	5655	ljɨ.	1_69	寶	03.02A.1	11	0
躋	5205	ɣa.	1_63	劒	03.02A.1	12	0
笄	4342	dja	2_17	D1	03.02A.1	13	0
廿	1799	thu	2_01	脫	03.02A.1	14	0
册	2592	la	2_14	墓	03.02A.1	15	0
哦	2750	ɣu	1_04	頭	03.02A.2	1	0
喬	5856	ɣa	2_14	P.	03.02A.2	2	0
堪	5670	o	1_49	垂	03.02A.2	3	0
豕	5113	.wji	1_10	為1	03.02A.2	4	0
郁	5354	thjɨ	2_28	此	03.02A.2	5	0
税	1183	da.	2_56	事	03.02A.2	6	0
聨	4591	ɕjwɨ	1_29	說	03.02A.2	7	0
往	5467	.jwã	1_26	苑	03.02A.2	8	0
蔡	4797	.jwɨr	2_77	文	03.02A.2	9	0
計	5993	kha	1_17	中	03.02A.2	10	0
赫	5612	tshjiij	1_39	說1	03.02A.2	11	0
計	5993	kha	1_17	中	03.02A.3	1	0
具	5925	tsə	1_27	子	03.02A.3	2	0
畑	1906	nioow	1_57	後	03.02A.3	3	0
剳	2639	mjiij	2_35	名	03.02A.3	4	0
葮	4775	khjow	2_48	轲	03.02A.3	5	0
組	1278	.jɨ	2_28	謂	03.02A.3	6	0
荘	1319	tshji	1_11	齊	03.02A.3	7	0
妲	2937	lhji.j	0	國	03.02A.3	8	0
假	2541	dzjwo	2_44	人	03.02A.3	9	0
攻	0508	ŋwu	2_01	是	03.02A.3	10	0
詮	1245	.jij	1_36	自	03.02A.3	11	0
爆	1892	mjii	1_14	宅	03.02A.3	12	0
翫	5725	.wjɨ.	2_61	東	03.02A.3	13	0
挧	3349	rjijr	2_68	方	03.02A.3	14	0
垪	2862	nji	1_11	家	03.02A.3	15	0
蜿	4889	dʑjwɨ	1_30	鄰	03.02A.4	1	0
迩	1794	.o	1_49	主	03.02A.4	2	0
蜉	4884	nji	2_10	等	03.02A.4	3	0
串	0294	.wa	1_17	豬	03.02A.4	4	0
司	0716	ɕjii	1_14	宰1	03.02A.4	5	0
桝	2259	miej	2_31	孟	03.02A.4	6	0
具	5925	tsə	1_27	子	03.02A.4	7	0
伎	0092	mja	1_20	母	03.02A.4	8	0
杉	1139	.jij	1_36	P.	03.02A.4	9	0
笄	4342	dja	2_17	D1	03.02A.4	10	0
復	2082	.jɨr	1_86	問	03.02A.4	11	0
串	0294	.wa	1_17	豬	03.02A.4	12	0
司	0716	ɕjii	1_14	宰1	03.02A.4	13	0
帚	3092	djij	2_33	PROG	03.02A.4	14	0
棘	3583	tja	1_20	者	03.02A.4	15	0
好	0491	ljo.	2_64	豈	03.02A.5	1	0
羊	2417	ɕjwo	1_48	用	03.02A.5	2	0
組	1278	.jɨ	2_28	謂	03.02A.5	3	0
伎	0092	mja	1_20	母	03.02A.5	4	0
臓	1333	dʑju.	2_52	戲	03.02A.5	5	0
縻	4493	dʑji.j	2_54	言	03.02A.5	6	0
仰	5880	ŋwu	2_01	而	03.02A.5	7	0
譲	1045	da.	2_56	曰	03.02A.5	8	0
組	1278	.jɨ	2_28	謂	03.02A.5	9	0
烱	3926	nja	2_17	汝	03.02A.5	10	0
冂	2590	.wjɨ	2_27	D1	03.02A.5	11	0
羈	4547	dzjo	1_51	食2	03.02A.5	12	0
肅	4601	nja	2_17	2SG	03.02A.5	13	0
組	1278	.jɨ	2_28	謂	03.02A.5	14	0
赫	5612	tshjiij	1_39	說1	03.02A.5	15	0
関	5712	dʑjwa	1_19	終	03.02A.6	1	0
畑	1906	nioow	1_57	後	03.02A.6	2	0
伎	0092	mja	1_20	母	03.02A.6	3	0
血	0374	lhjii	1_14	悔	03.02A.6	4	0
譲	1045	da.	2_56	曰	03.02A.6	5	0
証	1014	ŋwuu	1_05	語	03.02A.6	6	0
遭	1326	kjɨ	1_30	D1	03.02A.6	7	0
縷	4497	dzaa	1_22	失	03.02A.6	8	0
噴	2098	ŋa	2_14	1SG	03.02A.6	9	0
組	1278	.jɨ	2_28	謂	03.02A.6	10	0
蛇	0824	tɕhjɨ	2_27	立	03.02A.6	11	0
泳	5417	rjar	2_74	即	03.02A.6	12	0
旻	3465	tɕhji	1_10	肉	03.02A.6	13	0
供	5845	lwə	2_25	買	03.02A.6	14	0
桝	2259	miej	2_31	孟	03.02A.6	15	0
具	5925	tsə	1_27	子	03.02A.7	1	0
杉	1139	.jij	1_36	P.	03.02A.7	2	0
笄	4342	dja	2_17	D1	03.02A.7	3	0
罧	4542	mji	1_11	喂	03.02A.7	4	0
毳	3744	dʑiej	2_31	信	03.02A.7	5	0
閥	1918	mji	1_11	不	03.02A.7	6	0
阪	0649	ljwu	1_03	失	03.02A.7	7	0
杉	1139	.jij	1_36	P.	03.02A.7	8	0
捕	2149	dʑju	1_02	顯	03.02A.7	9	0
蠣	4868	gjii	2_12	願	03.02A.7	10	0
亳	2484	nioow	1_57	因	03.02A.7	11	0
哀	5285	ljɨ	1_29	也	03.02A.7	12	0
恍	3200	tɕhjiw	1_46	六	03.02A.7	13	0
妲	2937	lhji.j	0	國	03.02A.7	14	0
弋	3139	ɕjij	1_35	代	03.02A.7	15	0
假	2541	dzjwo	2_44	人	03.02B.1	1	0
攻	0508	ŋwu	2_01	是	03.02B.1	2	0
階	5574	.wji	2_09	尾	03.02B.2	1	0
鮪	2256	ɕjəj	1_41	生	03.02B.2	2	0
暁	0243	sji	2_10	婦	03.02B.2	3	0
假	2541	dzjwo	2_44	人	03.02B.2	4	0
誇	0448	gjɨ	2_28	一	03.02B.2	5	0
衫	4950	rjir	2_72	P.	03.02B.2	6	0
兢	2584	dzow	1_55	橋	03.02B.2	7	0
厩	5399	khju	1_03	下	03.02B.2	8	0
遭	1326	kjɨ	1_30	D1	03.02B.2	9	0
悗	3216	ljwu	2_03	聚	03.02B.2	10	0
嫉	0795	rjɨr	2_77	D1	03.02B.2	11	0
花	5522	ljiij	2_35	待1	03.02B.2	12	0
信	1064	mjij	2_33	未	03.02B.2	13	0
友	2373	lji.j	2_54	來	03.02B.2	14	0
崑	3058	zjɨɨr	2_85	水	03.02B.2	15	0
絛	4456	lji.j	2_54	大	03.02B.3	1	0
皎	4161	lju.	1_59	流	03.02B.3	2	0
豫	2474	rar	2_73	過	03.02B.3	3	0
階	5574	.wji	2_09	尾	03.02B.3	4	0
鮪	2256	ɕjəj	1_41	生	03.02B.3	5	0
蛇	0824	tɕhjɨ	2_27	立	03.02B.3	6	0
泳	5417	rjar	2_74	即	03.02B.3	7	0
兢	2584	dzow	1_55	橋	03.02B.3	8	0
籐	4399	dzji.	2_60	柱	03.02B.3	9	0
遭	1326	kjɨ	1_30	D1	03.02B.3	10	0
奕	2921	.wjijr	2_68	抱	03.02B.3	11	0
笄	4342	dja	2_17	D1	03.02B.3	12	0
嶄	3072	sji	2_10	死1	03.02B.3	13	0
郁	5354	thjɨ	2_28	此	03.02B.3	14	0
棘	3583	tja	1_20	者	03.02B.3	15	0
毳	3744	dʑiej	2_31	信	03.02B.4	1	0
紵	4444	ljɨ.	1_69	及	03.02B.4	2	0
攻	0508	ŋwu	2_01	是	03.02B.4	3	0
帚	3092	djij	2_33	PROG	03.02B.4	4	0
刳	2628	goor	1_94	君	03.02B.4	5	0
掴	1567	gji	2_10	子	03.02B.4	6	0
郁	5354	thjɨ	2_28	此	03.02B.4	7	0
格	5604	dʑjɨ	0	業	03.02B.4	8	0
閥	1918	mji	1_11	不	03.02B.4	9	0
溪	3844	dʑji.j	1_61	行	03.02B.4	10	0
哀	5285	ljɨ	1_29	也	03.02B.4	11	0
悄	3213	tsjĩ	1_16	晉	03.02B.5	1	0
堋	2872	.wẽ	1_15	文	03.02B.5	2	0
毆	3738	kow	1_54	公	03.02B.5	3	0
畑	1906	nioow	1_57	後	03.02B.5	4	0
股	0444	tɕhjow	1_56	重	03.02B.5	5	0
環	0052	zji	1_10	耳	03.02B.5	6	0
組	1278	.jɨ	2_28	謂	03.02B.5	7	0
曙	0938	lji	1_10	驪	03.02B.5	8	0
赱	5157	kji	1_11	姬	03.02B.5	9	0
倆	2539	kja.	1_64	驚	03.02B.5	10	0
衫	4950	rjir	2_72	P.	03.02B.5	11	0
桂	5981	.a	0	D1	03.02B.5	12	0
苅	0019	ber	1_72	遇	03.02B.5	13	0
蚌	4861	zjo.	2_64	時	03.02B.5	14	0
賑	1796	tɕhju.	1_59	楚	03.02B.5	15	0
妲	2937	lhji.j	0	國	03.02B.6	1	0
哦	2750	ɣu	1_04	頭	03.02B.6	2	0
遭	1326	kjɨ	1_30	D1	03.02B.6	3	0
忸	3175	tji.	1_67	歸	03.02B.6	4	0
賑	1796	tɕhju.	1_59	楚	03.02B.6	5	0
渣	3830	njij	2_33	王	03.02B.6	6	0
瑕	4040	khjuu	1_06	迎	03.02B.6	7	0
徂	3159	lhji.j	2_54	受1	03.02B.6	8	0
譲	1045	da.	2_56	曰	03.02B.6	9	0
組	1278	.jɨ	2_28	謂	03.02B.6	10	0
烱	3926	nja	2_17	汝	03.02B.6	11	0
妲	2937	lhji.j	0	國	03.02B.6	12	0
夛	2912	lhjwo	1_48	還	03.02B.6	13	0
賛	0705	zji.j	1_61	時	03.02B.6	14	0
汗	5688	.wa	2_14	何	03.02B.6	15	0
仰	5880	ŋwu	2_01	而	03.02B.7	1	0
弘	0502	zjɨɨr	1_92	寡	03.02B.7	2	0
鉱	0545	dʑjwu	1_02	人	03.02B.7	3	0
杉	1139	.jij	1_36	P.	03.02B.7	4	0
最	0619	njwi	1_11	恩	03.02B.7	5	0
著	1514	ljɨɨ	1_32	報	03.02B.7	6	0
肅	4601	nja	2_17	2SG	03.02B.7	7	0
組	1278	.jɨ	2_28	謂	03.02B.7	8	0
股	0444	tɕhjow	1_56	重	03.02B.7	9	0
環	0052	zji	1_10	耳	03.02B.7	10	0
譲	1045	da.	2_56	曰	03.02B.7	11	0
虻	5306	dzjwɨ	1_30	君	03.02B.7	12	0
杉	1139	.jij	1_36	之	03.02B.7	13	0
麼	3111	mji.jr	2_68	神	03.02B.7	14	0
捐	3354	ɣie	1_09	力	03.02B.7	15	0
仰	5880	ŋwu	2_01	而	03.03A.1	1	0
授	0856	mər	2_76	本	03.03A.1	2	0
妲	2937	lhji.j	0	國	03.03A.1	3	0
夛	2912	lhjwo	1_48	還	03.03A.1	4	0
弟	1599	rjir	1_79	得1	03.03A.1	5	0
超	1542	ku	1_01	故	03.03A.1	6	0
裴	4978	tjij	1_36	若	03.03A.1	7	0
虻	5306	dzjwɨ	1_30	君	03.03A.1	8	0
妲	2937	lhji.j	0	國	03.03A.1	9	0
朝	1531	gja	1_20	軍	03.03A.1	10	0
蒲	0009	ɕjwo	1_48	發	03.03A.1	11	0
禽	0261	mjo	2_44	我	03.03A.1	12	0
妲	2937	lhji.j	0	國	03.03A.1	13	0
朝	1531	gja	1_20	軍	03.03A.1	14	0
衫	4950	rjir	2_72	P.	03.03A.1	15	0
諺	0425	dwə	1_84	鬥	03.03A.2	1	0
賛	0705	zji.j	1_61	時	03.03A.2	2	0
禽	0261	mjo	2_44	我	03.03A.2	3	0
朝	1531	gja	1_20	軍	03.03A.2	4	0
虻	5306	dzjwɨ	1_30	君	03.03A.2	5	0
朝	1531	gja	1_20	軍	03.03A.2	6	0
杉	1139	.jij	1_36	P.	03.03A.2	7	0
庠	3113	gjɨɨ	1_32	九	03.03A.2	8	0
紳	1084	ɣa.	2_56	十	03.03A.2	9	0
嘲	2804	bjuu	2_06	里	03.03A.2	10	0
九	5913	rjar	1_82	程	03.03A.2	11	0
裳	1012	zji.j	1_61	幾	03.03A.2	12	0
血	0374	lhjii	1_14	退	03.03A.2	13	0
剥	1879	bji	2_10	避	03.03A.2	14	0
楞	3621	.wjo	1_51	為2	03.03A.2	15	0
噴	2098	ŋa	2_14	1SG	03.03A.3	1	0
組	1278	.jɨ	2_28	謂	03.03A.3	2	0
佶	2503	ku.	1_55	後	03.03A.3	3	0
股	0444	tɕhjow	1_56	重	03.03A.3	4	0
環	0052	zji	1_10	耳	03.03A.3	5	0
授	0856	mər	2_76	本	03.03A.3	6	0
妲	2937	lhji.j	0	國	03.03A.3	7	0
遭	1326	kjɨ	1_30	D1	03.03A.3	8	0
夛	2912	lhjwo	1_48	還	03.03A.3	9	0
虻	5306	dzjwɨ	1_30	君	03.03A.3	10	0
淤	3819	lu	2_01	位	03.03A.3	11	0
冂	2590	.wjɨ	2_27	D1	03.03A.3	12	0
籟	4401	zow	2_47	持	03.03A.3	13	0
賑	1796	tɕhju.	1_59	楚	03.03A.3	14	0
妲	2937	lhji.j	0	國	03.03A.3	15	0
湫	3831	ljij	2_33	令	03.03A.4	1	0
廬	3128	.jwĩ	1_16	尹	03.03A.4	2	0
具	5925	tsə	1_27	子	03.03A.4	3	0
磁	0775	giuu	1_07	玉	03.03A.4	4	0
朝	1531	gja	1_20	軍	03.03A.4	5	0
蒲	0009	ɕjwo	1_48	發	03.03A.4	6	0
蟇	4921	swẽ	1_15	宋	03.03A.4	7	0
妲	2937	lhji.j	0	國	03.03A.4	8	0
顔	0089	tɕhjaa	1_21	P.	03.03A.4	9	0
支	0731	lju	2_02	投1	03.03A.4	10	0
綯	4469	ɕji	2_09	往1	03.03A.4	11	0
蟇	4921	swẽ	1_15	宋	03.03A.4	12	0
渣	3830	njij	2_33	王	03.03A.4	13	0
悄	3213	tsjĩ	1_16	晉	03.03A.4	14	0
渣	3830	njij	2_33	王	03.03A.4	15	0
演	5447	do	2_42	P.	03.03A.5	1	0
囗	2830	dju	1_03	告	03.03A.5	2	0
朝	1531	gja	1_20	軍	03.03A.5	3	0
篠	0804	djɨ	2_28	D1	03.03A.5	4	0
罪	0645	.wu	2_51	助	03.03A.5	5	0
掬	0147	ɕjij	2_32	請	03.03A.5	6	0
堋	2872	.wẽ	1_15	文	03.03A.5	7	0
毆	3738	kow	1_54	公	03.03A.5	8	0
渣	3830	njij	2_33	王	03.03A.5	9	0
朝	1531	gja	1_20	軍	03.03A.5	10	0
蒲	0009	ɕjwo	1_48	發	03.03A.5	11	0
蟇	4921	swẽ	1_15	宋	03.03A.5	12	0
杉	1139	.jij	1_36	P.	03.03A.5	13	0
啾	2776	gjuu	2_06	救	03.03A.5	14	0
綯	4469	ɕji	2_09	往1	03.03A.5	15	0
粉	2104	ɕji	1_10	先	03.03A.6	1	0
賑	1796	tɕhju.	1_59	楚	03.03A.6	2	0
妲	2937	lhji.j	0	國	03.03A.6	3	0
最	0619	njwi	1_11	恩	03.03A.6	4	0
著	1514	ljɨɨ	1_32	報	03.03A.6	5	0
毳	3744	dʑiej	2_31	信	03.03A.6	6	0
閥	1918	mji	1_11	不	03.03A.6	7	0
阪	0649	ljwu	1_03	失	03.03A.6	8	0
蠣	4868	gjii	2_12	願	03.03A.6	9	0
亳	2484	nioow	1_57	故	03.03A.6	10	0
賑	1796	tɕhju.	1_59	楚	03.03A.6	11	0
朝	1531	gja	1_20	軍	03.03A.6	12	0
衫	4950	rjir	2_72	P.	03.03A.6	13	0
諺	0425	dwə	1_84	鬥	03.03A.6	14	0
棔	3589	dzjɨj	1_42	時	03.03A.6	15	0
詮	1245	.jij	1_36	自	03.03A.7	1	0
朝	1531	gja	1_20	軍	03.03A.7	2	0
庠	3113	gjɨɨ	1_32	九	03.03A.7	3	0
紳	1084	ɣa.	2_56	十	03.03A.7	4	0
嘲	2804	bjuu	2_06	里	03.03A.7	5	0
裳	1012	zji.j	1_61	幾	03.03A.7	6	0
冂	2590	.wjɨ	2_27	D1	03.03A.7	7	0
血	0374	lhjii	1_14	退	03.03A.7	8	0
笄	4342	dja	2_17	D1	03.03A.7	9	0
剥	1879	bji	2_10	避	03.03A.7	10	0
豕	5113	.wji	1_10	為1	03.03A.7	11	0
求	5815	tsjɨ	1_30	亦	03.03A.7	12	0
閥	1918	mji	1_11	不	03.03A.7	13	0
送	1325	tow	1_54	利	03.03A.7	14	0
賑	1796	tɕhju.	1_59	楚	03.03A.7	15	0
朝	1531	gja	1_20	軍	03.03B.1	1	0
薬	2356	dʑjiw	1_45	追	03.03B.1	2	0
艸	4693	na	1_17	深	03.03B.1	3	0
豕	5113	.wji	1_10	為1	03.03B.1	4	0
超	1542	ku	1_01	故	03.03B.1	5	0
堋	2872	.wẽ	1_15	文	03.03B.1	6	0
毆	3738	kow	1_54	公	03.03B.1	7	0
詮	1245	.jij	1_36	自	03.03B.1	8	0
朝	1531	gja	1_20	軍	03.03B.1	9	0
著	1514	ljɨɨ	1_32	回	03.03B.1	10	0
桂	5981	.a	0	D1	03.03B.1	11	0
蟐	4916	ɣwej	1_33	戰	03.03B.1	12	0
蛇	0824	tɕhjɨ	2_27	立	03.03B.1	13	0
泳	5417	rjar	2_74	即	03.03B.1	14	0
賑	1796	tɕhju.	1_59	楚	03.03B.1	15	0
朝	1531	gja	1_20	軍	03.03B.2	1	0
絛	4456	lji.j	2_54	大	03.03B.2	2	0
鋳	1508	bej	1_33	敗	03.03B.2	3	0
賑	1796	tɕhju.	1_59	楚	03.03B.2	4	0
渣	3830	njij	2_33	王	03.03B.2	5	0
觴	5026	mji	1_11	聞1	03.03B.2	6	0
畑	1906	nioow	1_57	後	03.03B.2	7	0
絛	4456	lji.j	2_54	大	03.03B.2	8	0
藷	0945	tshja.	1_64	怒	03.03B.2	9	0
具	5925	tsə	1_27	子	03.03B.2	10	0
磁	0775	giuu	1_07	玉	03.03B.2	11	0
杉	1139	.jij	1_36	P.	03.03B.2	12	0
嚢	1827	ʑier	1_78	罵	03.03B.2	13	0
詮	1245	.jij	1_36	自	03.03B.2	14	1
詮	1245	.jij	1_36	自	03.03B.2	15	0
笄	4342	dja	2_17	D1	03.03B.3	1	0
砠	4225	sja	1_20	殺	03.03B.3	2	0
餐	0707	tɕjiw	1_45	周	03.03B.3	3	0
套	1683	sjo	2_44	襄	03.03B.3	4	0
渣	3830	njij	2_33	王	03.03B.3	5	0
弋	3139	ɕjij	1_35	代	03.03B.3	6	0
假	2541	dzjwo	2_44	人	03.03B.3	7	0
攻	0508	ŋwu	2_01	是	03.03B.3	8	0
嬢	1034	kwo	1_19	郭	03.03B.4	1	0
瑟	4042	kjɨ.	2_61	伋	03.03B.4	2	0
畑	1906	nioow	1_57	後	03.03B.4	3	0
剳	2639	mjiij	2_35	名	03.03B.4	4	0
附	2067	sji	1_10	细	03.03B.4	5	0
揄	3379	xew	1_43	侯	03.03B.4	6	0
組	1278	.jɨ	2_28	謂	03.03B.4	7	0
橸	3669	na	1_17	南	03.03B.4	8	0
譎	5087	.jow	1_57	陽	03.03B.4	9	0
刮	2627	ljɨ.	2_61	地	03.03B.4	10	0
辷	5258	.io.	1_71	方	03.03B.4	11	0
假	2541	dzjwo	2_44	人	03.03B.4	12	0
攻	0508	ŋwu	2_01	是	03.03B.4	13	0
蚰	4866	kiej	1_34	更	03.03B.4	14	0
延	5442	ɕiə	1_28	始	03.03B.4	15	0
戔	3305	kjiw	1_45	年	03.03B.5	1	0
孚	2983	.u	2_01	中	03.03B.5	2	0
役	2354	pjij	1_36	并	03.03B.5	3	0
餐	0707	tɕjiw	1_45	州	03.03B.5	4	0
外	5578	nwə	0	牧	03.03B.5	5	0
叭	2708	rjar	1_82	司	03.03B.5	6	0
壅	2893	khwej	2_30	大	03.03B.5	7	0
嫉	0795	rjɨr	2_77	D1	03.03B.5	8	0
豕	5113	.wji	1_10	為1	03.03B.5	9	0
痊	4115	gjij	2_33	野	03.03B.5	10	0
嘛	2797	lho	0	出	03.03B.5	11	0
詮	1245	.jij	1_36	自	03.03B.5	12	0
刮	2627	ljɨ.	2_61	地	03.03B.5	13	0
辷	5258	.io.	1_71	方	03.03B.5	14	0
孚	2983	.u	2_01	中	03.03B.5	15	0
溲	3852	dʑjij	1_35	行	03.03B.6	1	0
綯	4469	ɕji	2_09	往1	03.03B.6	2	0
穗	4293	sji	1_11	西	03.03B.6	3	0
柿	5595	xwo	2_42	河	03.03B.6	4	0
識	0785	bju	2_02	邊	03.03B.6	5	0
喬	5856	ɣa	2_14	P.	03.03B.6	6	0
區	2679	njɨ	2_28	至	03.03B.6	7	0
紳	1084	ɣa.	2_56	十	03.03B.6	8	0
裳	1012	zji.j	1_61	幾	03.03B.6	9	0
荷	5525	zjɨ.	1_69	兒	03.03B.6	10	0
腺	1241	lji	2_09	童	03.03B.6	11	0
茯	4726	lhju.	2_52	竹	03.03B.6	12	0
字	0764	rjijr	1_74	馬	03.03B.6	13	0
琺	4039	0	2_69	騎	03.03B.6	14	0
仰	5880	ŋwu	2_01	而	03.03B.6	15	0
淌	3813	.wji.j	2_54	送	03.03B.7	1	0
友	2373	lji.j	2_54	來	03.03B.7	2	0
蛇	0824	tɕhjɨ	2_27	立	03.03B.7	3	0
泳	5417	rjar	2_74	即	03.03B.7	4	0
笄	4342	dja	2_17	D1	03.03B.7	5	0
復	2082	.jɨr	1_86	問	03.03B.7	6	0
汗	5688	.wa	2_14	何	03.03B.7	7	0
頼	2440	njɨɨ	2_29	日	03.03B.7	8	0
夛	2912	lhjwo	1_48	還	03.03B.7	9	0
肅	4601	nja	2_17	2SG	03.03B.7	10	0
組	1278	.jɨ	2_28	謂	03.03B.7	11	0
嬢	1034	kwo	1_19	郭	03.03B.7	12	0
瑟	4042	kjɨ.	2_61	伋	03.03B.7	13	0
犧	3990	khjɨ	1_30	足	03.03B.7	14	0
萠	4762	tɕhjij	1_35	舉	03.03B.7	15	0
夛	2912	lhjwo	1_48	還	03.04A.1	1	0
膏	0535	ɕjij	1_35	順	03.04A.1	2	0
吼	2715	dʑjij	2_32	簿	03.04A.1	3	0
籟	4401	zow	2_47	持	03.04A.1	4	0
淙	3818	mjijr	2_68	者	03.04A.1	5	0
杉	1139	.jij	1_36	P.	03.04A.1	6	0
稿	0524	dzju	1_02	指	03.04A.1	7	0
纐	4520	bji	2_10	揮	03.04A.1	8	0
頼	2440	njɨɨ	2_29	日	03.04A.1	9	0
舎	0811	.jaar	2_75	日	03.04A.1	10	0
荷	5525	zjɨ.	1_69	兒	03.04A.1	11	0
腺	1241	lji	2_09	童	03.04A.1	12	0
巷	0497	ŋewr	2_78	多	03.04A.1	13	0
杉	1139	.jij	1_36	之	03.04A.1	14	0
仇	0166	mji.	1_67	告	03.04A.1	15	0
視	0749	phji	1_11	使1	03.04A.2	1	0
嬢	1034	kwo	1_19	郭	03.04A.2	2	0
瑟	4042	kjɨ.	2_61	伋	03.04A.2	3	0
刮	2627	ljɨ.	2_61	地	03.04A.2	4	0
辷	5258	.io.	1_71	方	03.04A.2	5	0
孚	2983	.u	2_01	中	03.04A.2	6	0
犢	3989	.jij	1_36	D2	03.04A.2	7	0
溲	3852	dʑjij	1_35	行	03.04A.2	8	0
遭	1326	kjɨ	1_30	D1	03.04A.2	9	0
夛	2912	lhjwo	1_48	還	03.04A.2	10	0
粉	2104	ɕji	1_10	先	03.04A.2	11	0
悗	3216	ljwu	2_03	聚	03.04A.2	12	0
頼	2440	njɨɨ	2_29	日	03.04A.2	13	0
嫉	0795	rjɨr	2_77	D1	03.04A.2	14	0
豕	5113	.wji	1_10	為1	03.04A.2	15	0
棔	3589	dzjɨj	1_42	時	03.04A.3	1	0
信	1064	mjij	2_33	不	03.04A.3	2	0
區	2679	njɨ	2_28	至	03.04A.3	3	0
孤	0433	bju	1_03	P.	03.04A.3	4	0
空	0289	.we	2_07	城	03.04A.3	5	0
漢	5689	ɣa	1_17	戶	03.04A.3	6	0
孚	2983	.u	2_01	中	03.04A.3	7	0
閥	1918	mji	1_11	不	03.04A.3	8	0
縅	4481	ɕjɨ	1_29	往2	03.04A.3	9	0
倡	2533	djɨr	2_77	外	03.04A.3	10	0
畑	1906	nioow	1_57	後	03.04A.3	11	0
幃	3099	dʑjiij	1_39	居	03.04A.3	12	0
吼	2715	dʑjij	2_32	簿	03.04A.3	13	0
籟	4401	zow	2_47	持	03.04A.3	14	0
嬢	1034	kwo	1_19	郭	03.04A.3	15	0
瑟	4042	kjɨ.	2_61	伋	03.04A.4	1	0
杉	1139	.jij	1_36	P.	03.04A.4	2	0
笄	4342	dja	2_17	D1	03.04A.4	3	0
復	2082	.jɨr	1_86	問	03.04A.4	4	0
孱	3027	ku.	2_51	答	03.04A.4	5	0
禽	0261	mjo	2_44	我	03.04A.4	6	0
荷	5525	zjɨ.	1_69	兒	03.04A.4	7	0
腺	1241	lji	2_09	童	03.04A.4	8	0
子	0724	njɨ	2_28	等	03.04A.4	9	0
衫	4950	rjir	2_72	P.	03.04A.4	10	0
悗	3216	ljwu	2_03	聚	03.04A.4	11	0
壇	1463	du	2_04	期	03.04A.4	12	0
嫉	0795	rjɨr	2_77	D1	03.04A.4	13	0
豕	5113	.wji	1_10	為1	03.04A.4	14	0
合	0557	dʑju	1_02	欺	03.04A.4	15	0
誠	1175	ljwu	1_03	騙	03.04A.5	1	0
鞄	5645	tji.	2_60	處	03.04A.5	2	0
飽	2194	mjij	1_36	無	03.04A.5	3	0
組	1278	.jɨ	2_28	謂	03.04A.5	4	0
佶	2503	ku.	1_55	後	03.04A.5	5	0
頼	2440	njɨɨ	2_29	日	03.04A.5	6	0
荷	5525	zjɨ.	1_69	兒	03.04A.5	7	0
腺	1241	lji	2_09	童	03.04A.5	8	0
巷	0497	ŋewr	2_78	多	03.04A.5	9	0
釜	0010	zji	2_10	皆	03.04A.5	10	0
茯	4726	lhju.	2_52	竹	03.04A.5	11	0
字	0764	rjijr	1_74	馬	03.04A.5	12	0
琺	4039	0	2_69	騎	03.04A.5	13	0
仰	5880	ŋwu	2_01	而	03.04A.5	14	0
瑕	4040	khjuu	1_06	迎	03.04A.5	15	0
友	2373	lji.j	2_54	來	03.04A.6	1	0
楕	1374	tɕhjɨ	1_29	此	03.04A.6	2	0
杼	3527	mja	1_20	然	03.04A.6	3	0
畑	1906	nioow	1_57	後	03.04A.6	4	0
空	0289	.we	2_07	城	03.04A.6	5	0
孚	2983	.u	2_01	中	03.04A.6	6	0
嫉	0795	rjɨr	2_77	D1	03.04A.6	7	0
綯	4469	ɕji	2_09	往1	03.04A.6	8	0
郁	5354	thjɨ	2_28	此	03.04A.6	9	0
税	1183	da.	2_56	事	03.04A.6	10	0
温	5493	xã	2_22	漢	03.04A.6	11	0
弋	3139	ɕjij	1_35	代	03.04A.6	12	0
蔡	4797	.jwɨr	2_77	文	03.04A.6	13	0
計	5993	kha	1_17	中	03.04A.6	14	0
赫	5612	tshjiij	1_39	說1	03.04A.6	15	0
扶	2052	xiwã	1_25	范	03.04A.7	1	0
繖	4502	ɕjɨ	2_27	式	03.04A.7	2	0
畑	1906	nioow	1_57	後	03.04A.7	3	0
剳	2639	mjiij	2_35	名	03.04A.7	4	0
嗔	2791	khju	2_03	巨	03.04A.7	5	0
帑	3094	khjij	1_36	卿	03.04A.7	6	0
組	1278	.jɨ	2_28	謂	03.04A.7	7	0
汨	3763	ɕjã	1_25	山	03.04A.7	8	0
譎	5087	.jow	1_57	陽	03.04A.7	9	0
灼	0830	kjĩ	1_16	金	03.04A.7	10	0
攘	3423	xjow	1_56	鄉	03.04A.7	11	0
刮	2627	ljɨ.	2_61	地	03.04A.7	12	0
辷	5258	.io.	1_71	方	03.04A.7	13	0
假	2541	dzjwo	2_44	人	03.04A.7	14	0
攻	0508	ŋwu	2_01	是	03.04A.7	15	0
還	5708	ʑju	2_02	汝	03.04B.1	1	0
橸	3669	na	1_17	南	03.04B.1	2	0
刮	2627	ljɨ.	2_61	地	03.04B.1	3	0
辷	5258	.io.	1_71	方	03.04B.1	4	0
剰	1030	tɕjow	1_56	張	03.04B.1	5	0
往	5467	.jwã	1_26	元	03.04B.1	6	0
契	5970	pie	1_09	伯	03.04B.1	7	0
衫	4950	rjir	2_72	P.	03.04B.1	8	0
褫	4989	.wjɨ.	1_67	朋	03.04B.1	9	0
蜿	4889	dʑjwɨ	1_30	友	03.04B.1	10	0
嫉	0795	rjɨr	2_77	D1	03.04B.1	11	0
豕	5113	.wji	1_10	為1	03.04B.1	12	0
給	0185	njwɨ	2_28	春	03.04B.1	13	0
壓	2894	lu	2_01	季	03.04B.1	14	0
渣	3830	njij	2_33	王	03.04B.1	15	0
空	0289	.we	2_07	城	03.04B.2	1	0
孚	2983	.u	2_01	中	03.04B.2	2	0
冂	2590	.wjɨ	2_27	D1	03.04B.2	3	0
趺	5163	dʑjow	1_56	分	03.04B.2	4	0
整	1160	ka	2_14	離	03.04B.2	5	0
去	5828	tsə.	1_68	秋	03.04B.2	6	0
脾	4625	mjiij	2_35	末	03.04B.2	7	0
遭	1326	kjɨ	1_30	D1	03.04B.2	8	0
悗	3216	ljwu	2_03	聚	03.04B.2	9	0
往	5467	.jwã	1_26	元	03.04B.2	10	0
契	5970	pie	1_09	伯	03.04B.2	11	0
譲	1045	da.	2_56	曰	03.04B.2	12	0
庠	3113	gjɨɨ	1_32	九	03.04B.2	13	0
嚠	2814	lhji.	2_60	月	03.04B.2	14	0
浄	1040	ɕja	1_19	十	03.04B.2	15	0
菱	1999	ŋwə	1_27	五	03.04B.3	1	0
頼	2440	njɨɨ	2_29	日	03.04B.3	2	0
羃	4546	.jaar	2_75	鷄	03.04B.3	3	0
司	0716	ɕjii	1_14	宰1	03.04B.3	4	0
冶	2346	dzju.	2_52	粳	03.04B.3	5	0
狂	5868	khie	2_08	米	03.04B.3	6	0
乕	4851	bia	2_15	粥	03.04B.3	7	0
豕	5113	.wji	1_10	為1	03.04B.3	8	0
棔	3589	dzjɨj	1_42	時	03.04B.3	9	0
賛	0705	zji.j	1_61	時	03.04B.3	10	0
花	5522	ljiij	2_35	待1	03.04B.3	11	0
肅	4601	nja	2_17	2SG	03.04B.3	12	0
組	1278	.jɨ	2_28	謂	03.04B.3	13	0
笄	4342	dja	2_17	D1	03.04B.3	14	0
佯	2511	rjɨr	2_77	去	03.04B.3	15	0
佶	2503	ku.	1_55	後	03.04B.4	1	0
往	5467	.jwã	1_26	元	03.04B.4	2	0
契	5970	pie	1_09	伯	03.04B.4	3	0
伎	0092	mja	1_20	母	03.04B.4	4	0
演	5447	do	2_42	P.	03.04B.4	5	0
譲	1045	da.	2_56	曰	03.04B.4	6	0
觴	5026	mji	1_11	聞1	03.04B.4	7	0
芸	0359	tu.	1_58	千	03.04B.4	8	0
嘲	2804	bjuu	2_06	里	03.04B.4	9	0
縅	4481	ɕjɨ	1_29	往2	03.04B.4	10	0
壇	1463	du	2_04	期	03.04B.4	11	0
顔	0089	tɕhjaa	1_21	P.	03.04B.4	12	0
旒	3456	lja	1_20	來	03.04B.4	13	0
噴	2098	ŋa	2_14	1SG	03.04B.4	14	0
組	1278	.jɨ	2_28	謂	03.04B.4	15	0
棘	3583	tja	1_20	者	03.04B.5	1	0
烱	3926	nja	2_17	汝	03.04B.5	2	0
毳	3744	dʑiej	2_31	信	03.04B.5	3	0
肅	4601	nja	2_17	2SG	03.04B.5	4	0
施	0734	mo	2_42	IRR	03.04B.5	5	0
組	1278	.jɨ	2_28	謂	03.04B.5	6	0
往	5467	.jwã	1_26	元	03.04B.5	7	0
契	5970	pie	1_09	伯	03.04B.5	8	0
譲	1045	da.	2_56	曰	03.04B.5	9	0
嗔	2791	khju	2_03	巨	03.04B.5	10	0
帑	3094	khjij	1_36	卿	03.04B.5	11	0
棘	3583	tja	1_20	者	03.04B.5	12	0
毳	3744	dʑiej	2_31	信	03.04B.5	13	0
廨	3126	dʑjij	2_32	有1	03.04B.5	14	0
假	2541	dzjwo	2_44	人	03.04B.5	15	0
攻	0508	ŋwu	2_01	是	03.04B.6	1	0
壇	1463	du	2_04	期	03.04B.6	2	0
阪	0649	ljwu	1_03	失	03.04B.6	3	0
淙	3818	mjijr	2_68	者	03.04B.6	4	0
範	1943	nja	2_18	非	03.04B.6	5	0
組	1278	.jɨ	2_28	謂	03.04B.6	6	0
赫	5612	tshjiij	1_39	說1	03.04B.6	7	0
関	5712	dʑjwa	1_19	終	03.04B.6	8	0
賛	0705	zji.j	1_61	時	03.04B.6	9	0
蛇	0824	tɕhjɨ	2_27	立	03.04B.6	10	0
泳	5417	rjar	2_74	即	03.04B.6	11	0
嗔	2791	khju	2_03	巨	03.04B.6	12	0
帑	3094	khjij	1_36	卿	03.04B.6	13	0
區	2679	njɨ	2_28	至	03.04B.6	14	0
友	2373	lji.j	2_54	來	03.04B.6	15	0
珎	4027	njɨɨ	1_32	二	03.04B.7	1	0
假	2541	dzjwo	2_44	人	03.04B.7	2	0
裟	0612	ɕiə	1_28	引	03.04B.7	3	0
繪	4507	ɕio	1_50	導	03.04B.7	4	0
伎	0092	mja	1_20	母	03.04B.7	5	0
演	5447	do	2_42	P.	03.04B.7	6	0
勵	2663	kjwɨ.	1_69	拜	03.04B.7	7	0
綯	4469	ɕji	2_09	往1	03.04B.7	8	0
捌	0685	ŋa.	2_56	好	03.04B.7	9	1
捌	0685	ŋa.	2_56	好	03.04B.7	10	0
笄	4342	dja	2_17	D1	03.04B.7	11	0
腮	4630	de	2_07	喜	03.04B.7	12	0
卓	1410	ljɨ.j	2_55	悅	03.04B.7	13	0
佶	2503	ku.	1_55	後	03.04B.7	14	0
温	5493	xã	2_22	漢	03.04B.7	15	0
弋	3139	ɕjij	1_35	代	03.05A.1	1	0
假	2541	dzjwo	2_44	人	03.05A.1	2	0
攻	0508	ŋwu	2_01	是	03.05A.1	3	0
雅	5545	kjur	2_70	志	03.05A.2	1	0
佃	1569	twu.	1_58	直	03.05A.2	2	0
揃	1355	tjij	1_36	篇	03.05A.2	3	0
紳	1084	ɣa.	2_56	十	03.05A.2	4	0
岐	0100	lew	1_43	一	03.05A.2	5	0
賑	1796	tɕhju.	1_59	鉏	03.05A.3	1	0
廖	3119	.ji	1_11	麑	03.05A.3	2	0
*					03.05A.3	3	0
堋	2872	.wẽ	1_15	温	03.05A.3	4	0
梧	0464	so	2_42	序	03.05A.3	5	0
*					03.05A.3	6	0
延	5442	ɕiə	1_28	師	03.05A.3	7	0
防	2219	kjij	1_36	經	03.05A.3	8	0
*					03.05A.3	9	0
餐	0707	tɕjiw	1_45	周	03.05A.3	10	0
軅	5218	tɕhjwo	1_48	昌	03.05A.3	11	0
*					03.05A.3	12	0
訟	1013	tɕju	1_02	朱	03.05A.3	13	0
廖	3119	.ji	1_11	雲	03.05A.3	14	0
*					03.05A.3	15	0
俵	2012	tũ	1_96	董	03.05A.3	16	0
多	1363	sjwa	1_20	宣	03.05A.3	17	0
剰	1030	tɕjow	1_56	張	03.05A.4	1	0
娑	2946	ko	1_49	鋼	03.05A.4	2	0
*					03.05A.4	3	0
拂	3342	su	1_01	蘇	03.05A.4	4	0
砿	0546	.u	2_01	武	03.05A.4	5	0
*					03.05A.4	6	0
世	1148	ʑjĩ	1_16	任	03.05A.4	7	0
惺	3237	tshow	1_54	座	03.05A.4	8	0
*					03.05A.4	9	0
痴	1478	gjĩ	1_16	嚴	03.05A.4	10	0
抉	3323	ŋiaa	2_20	顔	03.05A.4	11	0
賑	1796	tɕhju.	1_59	鉏	03.05A.5	1	0
廖	3119	.ji	1_11	麑	03.05A.5	2	0
袙	4962	.we	2_07	魏	03.05A.5	3	0
迹	5267	ljɨj	1_42	靈	03.05A.5	4	0
毆	3738	kow	1_54	公	03.05A.5	5	0
杉	1139	.jij	1_36	之	03.05A.5	6	0
捐	3354	ɣie	1_09	力	03.05A.5	7	0
淙	3818	mjijr	2_68	者	03.05A.5	8	0
攻	0508	ŋwu	2_01	是	03.05A.5	9	0
畑	1906	nioow	1_57	後	03.05A.5	10	0
朞	3508	bji	2_10	臣	03.05A.5	11	0
譟	5093	tɕhjiw	1_45	趙	03.05A.5	12	0
腴	4633	thwər	1_84	盾	03.05A.5	13	0
瀞	1760	ɕjwɨ	1_29	頻	03.05A.5	14	1
瀞	1760	ɕjwɨ	1_29	頻	03.05A.5	15	0
佃	1569	twu.	1_58	直	03.05A.6	1	0
仰	5880	ŋwu	2_01	而	03.05A.6	2	0
迹	5267	ljɨj	1_42	靈	03.05A.6	3	0
毆	3738	kow	1_54	公	03.05A.6	4	0
杉	1139	.jij	1_36	P.	03.05A.6	5	0
甄	4069	pjwɨɨr	1_92	諫	03.05A.6	6	0
迹	5267	ljɨj	1_42	靈	03.05A.6	7	0
毆	3738	kow	1_54	公	03.05A.6	8	0
俟	2516	ɣie.	2_59	害	03.05A.6	9	0
蒲	0009	ɕjwo	1_48	發	03.05A.6	10	0
槐	3627	nji	2_10	悄	03.05A.6	11	1
槐	3627	nji	2_10	悄	03.05A.6	12	0
賑	1796	tɕhju.	1_59	鉏	03.05A.6	13	0
廖	3119	.ji	1_11	麑	03.05A.6	14	0
胸	5871	zeew	2_41	遣	03.05A.6	15	0
譟	5093	tɕhjiw	1_45	趙	03.05A.7	1	0
腴	4633	thwər	1_84	盾	03.05A.7	2	0
杉	1139	.jij	1_36	之	03.05A.7	3	0
垪	2862	nji	1_11	家	03.05A.7	4	0
演	5447	do	2_42	P.	03.05A.7	5	0
袋	1394	tha	1_22	壓	03.05A.7	6	0
砠	4225	sja	1_20	殺	03.05A.7	7	0
縅	4481	ɕjɨ	1_29	往2	03.05A.7	8	0
視	0749	phji	1_11	使1	03.05A.7	9	0
譟	5093	tɕhjiw	1_45	趙	03.05A.7	10	0
腴	4633	thwər	1_84	盾	03.05A.7	11	0
縁	5453	bjij	2_33	黎	03.05A.7	12	0
伽	5500	sjij	1_36	明	03.05A.7	13	0
桂	5981	.a	0	D1	03.05A.7	14	0
賦	2064	.wor	1_89	起	03.05A.7	15	0
茖	4719	kie.j	2_53	朝	03.05B.1	1	0
縅	4481	ɕjɨ	1_29	往2	03.05B.1	2	0
甚	1101	.jij	1_36	FUT	03.05B.1	3	0
賛	0705	zji.j	1_61	時	03.05B.1	4	0
棋	0109	gji.j	1_61	星	03.05B.1	5	0
信	1064	mjij	2_33	無	03.05B.1	6	0
帛	3095	lwu	2_01	隱	03.05B.1	7	0
超	1542	ku	1_01	故	03.05B.1	8	0
茘	4729	lhwu	1_01	衣	03.05B.1	9	0
姦	5671	thjɨ	1_30	脫	03.05B.1	10	0
炭	1452	nja	1_20	D1	03.05B.1	11	0
薇	4825	me	2_07	睡	03.05B.1	12	0
賑	1796	tɕhju.	1_59	鉏	03.05B.1	13	0
廖	3119	.ji	1_11	麑	03.05B.1	14	0
譟	5093	tɕhjiw	1_45	趙	03.05B.1	15	0
腴	4633	thwər	1_84	盾	03.05B.2	1	0
杉	1139	.jij	1_36	P.	03.05B.2	2	0
菽	4751	sej	1_33	淨	03.05B.2	3	0
佃	1569	twu.	1_58	直	03.05B.2	4	0
譲	1045	da.	2_56	言	03.05B.2	5	0
冂	2590	.wjɨ	2_27	D1	03.05B.2	6	0
刄	2621	sjiij	2_35	思	03.05B.2	7	0
砠	4225	sja	1_20	殺	03.05B.2	8	0
椛	5643	mjɨ	1_30	不	03.05B.2	9	0
釘	1617	kjir	2_72	敢	03.05B.2	10	0
畑	1906	nioow	1_57	後	03.05B.2	11	0
求	5815	tsjɨ	1_30	亦	03.05B.2	12	0
迹	5267	ljɨj	1_42	靈	03.05B.2	13	0
毆	3738	kow	1_54	公	03.05B.2	14	0
杉	1139	.jij	1_36	P.	03.05B.2	15	0
譲	1045	da.	2_56	言	03.05B.3	1	0
阪	0649	ljwu	1_03	失	03.05B.3	2	0
鞄	5645	tji.	2_60	處	03.05B.3	3	0
飽	2194	mjij	1_36	無	03.05B.3	4	0
亳	2484	nioow	1_57	故	03.05B.3	5	0
詮	1245	.jij	1_36	自	03.05B.3	6	0
哦	2750	ɣu	1_04	頭	03.05B.3	7	0
狸	1438	dji.j	1_61	階	03.05B.3	8	0
謎	1778	.ju	2_02	前	03.05B.3	9	0
遭	1326	kjɨ	1_30	D1	03.05B.3	10	0
辿	1435	tsewr	2_78	觸	03.05B.3	11	0
笄	4342	dja	2_17	D1	03.05B.3	12	0
嶄	3072	sji	2_10	死1	03.05B.3	13	0
郁	5354	thjɨ	2_28	此	03.05B.3	14	0
税	1183	da.	2_56	事	03.05B.3	15	0
智	1476	tsow	2_47	左	03.05B.4	1	0
美	1990	tɕhjwã	1_26	傳	03.05B.4	2	0
蔡	4797	.jwɨr	2_77	文	03.05B.4	3	0
計	5993	kha	1_17	中	03.05B.4	4	0
赫	5612	tshjiij	1_39	說1	03.05B.4	5	0
堋	2872	.wẽ	1_15	温	03.05B.5	1	0
梧	0464	so	2_42	序	03.05B.5	2	0
畑	1906	nioow	1_57	後	03.05B.5	3	0
剳	2639	mjiij	2_35	名	03.05B.5	4	0
總	4467	tshə	1_27	次	03.05B.5	5	0
攘	3423	xjow	1_56	房	03.05B.5	6	0
組	1278	.jɨ	2_28	謂	03.05B.5	7	0
升	0959	thej	1_33	太	03.05B.5	8	0
榿	3628	ɣjwã	1_26	原	03.05B.5	9	0
刮	2627	ljɨ.	2_61	地	03.05B.5	10	0
辷	5258	.io.	1_71	方	03.05B.5	11	0
假	2541	dzjwo	2_44	人	03.05B.5	12	0
攻	0508	ŋwu	2_01	是	03.05B.5	13	0
甜	1642	khiwə	0	隗	03.05B.5	14	0
晤	3477	riwəj	1_41	嚣	03.05B.5	15	0
朝	1531	gja	1_20	軍	03.05B.6	1	0
嘸	2805	bjuu	2_06	將	03.05B.6	2	0
嫉	0795	rjɨr	2_77	D1	03.05B.6	3	0
豕	5113	.wji	1_10	為1	03.05B.6	4	0
温	5493	xã	2_22	漢	03.05B.6	5	0
妲	2937	lhji.j	0	國	03.05B.6	6	0
朝	1531	gja	1_20	軍	03.05B.6	7	0
杉	1139	.jij	1_36	P.	03.05B.6	8	0
絛	4456	lji.j	2_54	大	03.05B.6	9	0
鋳	1508	bej	1_33	敗	03.05B.6	10	0
視	0749	phji	1_11	使1	03.05B.6	11	0
嘸	2805	bjuu	2_06	將	03.05B.6	12	0
跳	1543	mjor	1_90	親	03.05B.6	13	0
気	5754	lju	2_03	捕1	03.05B.6	14	0
豕	5113	.wji	1_10	為1	03.05B.6	15	0
砠	4225	sja	1_20	殺	03.05B.7	1	0
甚	1101	.jij	1_36	FUT	03.05B.7	2	0
賛	0705	zji.j	1_61	時	03.05B.7	3	0
罸	4543	mər	1_84	嘴	03.05B.7	4	0
冦	2600	mjar	1_82	髮	03.05B.7	5	0
詞	0750	gjii	1_14	嚙	03.05B.7	6	0
仰	5880	ŋwu	2_01	而	03.05B.7	7	0
譲	1045	da.	2_56	曰	03.05B.7	8	0
組	1278	.jɨ	2_28	謂	03.05B.7	9	0
絛	4456	lji.j	2_54	大	03.05B.7	10	0
刳	2628	goor	1_94	君	03.05B.7	11	0
埒	2867	kiej	2_31	子	03.05B.7	12	0
棘	3583	tja	1_20	者	03.05B.7	13	0
玖	5918	sjɨ	1_30	死2	03.05B.7	14	0
賛	0705	zji.j	1_61	時	03.05B.7	15	0
罸	4543	mər	1_84	嘴	03.06A.1	1	0
冦	2600	mjar	1_82	髮	03.06A.1	2	0
閥	1918	mji	1_11	不	03.06A.1	3	0
管	5697	tɕior	1_90	污	03.06A.1	4	0
豕	5113	.wji	1_10	為1	03.06A.1	5	0
組	1278	.jɨ	2_28	謂	03.06A.1	6	0
蛇	0824	tɕhjɨ	2_27	立	03.06A.1	7	0
泳	5417	rjar	2_74	即	03.06A.1	8	0
罸	4543	mər	1_84	嘴	03.06A.1	9	0
冦	2600	mjar	1_82	髮	03.06A.1	10	0
詞	0750	gjii	1_14	嚙	03.06A.1	11	0
仰	5880	ŋwu	2_01	而	03.06A.1	12	0
笄	4342	dja	2_17	D1	03.06A.1	13	0
嶄	3072	sji	2_10	死1	03.06A.1	14	0
郁	5354	thjɨ	2_28	此	03.06A.1	15	0
税	1183	da.	2_56	事	03.06A.2	1	0
温	5493	xã	2_22	漢	03.06A.2	2	0
蔡	4797	.jwɨr	2_77	文	03.06A.2	3	0
計	5993	kha	1_17	中	03.06A.2	4	0
赫	5612	tshjiij	1_39	說1	03.06A.2	5	0
延	5442	ɕiə	1_28	師	03.06A.3	1	0
防	2219	kjij	1_36	經	03.06A.3	2	0
袙	4962	.we	2_07	魏	03.06A.3	3	0
堋	2872	.wẽ	1_15	文	03.06A.3	4	0
揄	3379	xew	1_43	侯	03.06A.3	5	0
渣	3830	njij	2_33	王	03.06A.3	6	0
弋	3139	ɕjij	1_35	代	03.06A.3	7	0
假	2541	dzjwo	2_44	人	03.06A.3	8	0
攻	0508	ŋwu	2_01	是	03.06A.3	9	0
島	1685	khjĩ	1_16	琴	03.06A.3	10	0
娥	2944	njar	1_82	彈	03.06A.3	11	0
吮	2716	rjijr	1_74	擅	03.06A.3	12	0
堋	2872	.wẽ	1_15	文	03.06A.3	13	0
揄	3379	xew	1_43	侯	03.06A.3	14	0
側	1338	dzu	1_01	愛	03.06A.3	15	0
孤	0433	bju	1_03	P.	03.06A.4	1	0
桂	5981	.a	0	D1	03.06A.4	2	0
賦	2064	.wor	1_89	起	03.06A.4	3	0
戛	3306	mju	2_03	舞	03.06A.4	4	0
豕	5113	.wji	1_10	為1	03.06A.4	5	0
延	5442	ɕiə	1_28	師	03.06A.4	6	0
防	2219	kjij	1_36	經	03.06A.4	7	0
藷	0945	tshja.	1_64	怒	03.06A.4	8	0
島	1685	khjĩ	1_16	琴	03.06A.4	9	0
仰	5880	ŋwu	2_01	而	03.06A.4	10	0
堋	2872	.wẽ	1_15	文	03.06A.4	11	0
揄	3379	xew	1_43	侯	03.06A.4	12	0
杉	1139	.jij	1_36	P.	03.06A.4	13	0
遭	1326	kjɨ	1_30	D1	03.06A.4	14	0
庚	0500	tsu.	1_59	撞	03.06A.4	15	0
堋	2872	.wẽ	1_15	文	03.06A.5	1	0
揄	3379	xew	1_43	侯	03.06A.5	2	0
桂	5981	.a	0	D1	03.06A.5	3	0
藷	0945	tshja.	1_64	怒	03.06A.5	4	0
假	2541	dzjwo	2_44	人	03.06A.5	5	0
胸	5871	zeew	2_41	派	03.06A.5	6	0
延	5442	ɕiə	1_28	師	03.06A.5	7	0
防	2219	kjij	1_36	經	03.06A.5	8	0
杉	1139	.jij	1_36	P.	03.06A.5	9	0
気	5754	lju	2_03	捕1	03.06A.5	10	0
視	0749	phji	1_11	使1	03.06A.5	11	0
延	5442	ɕiə	1_28	師	03.06A.5	12	0
防	2219	kjij	1_36	經	03.06A.5	13	0
粘	1822	ŋwuu	1_05	曰	03.06A.5	14	0
譲	1045	da.	2_56	曰	03.06A.5	15	0
桂	5981	.a	0	一	03.06A.6	1	0
恪	3195	gjwi	2_10	句	03.06A.6	2	0
裳	1012	zji.j	1_61	幾	03.06A.6	3	0
赫	5612	tshjiij	1_39	說1	03.06A.6	4	0
係	0322	tɕhjwo	1_48	方	03.06A.6	5	0
蘓	4841	djij	2_33	D2	03.06A.6	6	0
玖	5918	sjɨ	1_30	死2	03.06A.6	7	0
噴	2098	ŋa	2_14	1SG	03.06A.6	8	0
組	1278	.jɨ	2_28	謂	03.06A.6	9	0
堋	2872	.wẽ	1_15	文	03.06A.6	10	0
揄	3379	xew	1_43	侯	03.06A.6	11	0
譲	1045	da.	2_56	曰	03.06A.6	12	0
汗	5688	.wa	2_14	何	03.06A.6	13	0
爲	3974	tshjii	2_12	說2	03.06A.6	14	0
肅	4601	nja	2_17	2SG	03.06A.6	15	0
組	1278	.jɨ	2_28	謂	03.06A.7	1	0
延	5442	ɕiə	1_28	師	03.06A.7	2	0
防	2219	kjij	1_36	經	03.06A.7	3	0
譲	1045	da.	2_56	曰	03.06A.7	4	0
朞	3508	bji	2_10	臣	03.06A.7	5	0
猊	4005	kha	2_17	桀	03.06A.7	6	0
株	5646	tɕhjiw	2_40	紂	03.06A.7	7	0
虻	5306	dzjwɨ	1_30	君	03.06A.7	8	0
遭	1326	kjɨ	1_30	D1	03.06A.7	9	0
庚	0500	tsu.	1_59	撞	03.06A.7	10	0
噴	2098	ŋa	2_14	1SG	03.06A.7	11	0
瀘	3916	sji	2_10	PERF	03.06A.7	12	0
椛	5643	mjɨ	1_30	不	03.06A.7	13	0
帚	3092	djij	2_33	然	03.06A.7	14	0
煥	3939	.jiw	1_45	堯	03.06A.7	15	0
胥	4609	ɕjwã	2_24	舜	03.06B.1	1	0
虻	5306	dzjwɨ	1_30	君	03.06B.1	2	0
杉	1139	.jij	1_36	P.	03.06B.1	3	0
遭	1326	kjɨ	1_30	D1	03.06B.1	4	0
庚	0500	tsu.	1_59	撞	03.06B.1	5	0
噴	2098	ŋa	2_14	1SG	03.06B.1	6	0
範	1943	nja	2_18	非	03.06B.1	7	0
組	1278	.jɨ	2_28	謂	03.06B.1	8	0
堋	2872	.wẽ	1_15	文	03.06B.1	9	0
揄	3379	xew	1_43	侯	03.06B.1	10	0
譲	1045	da.	2_56	曰	03.06B.1	11	0
庚	0500	tsu.	1_59	撞	03.06B.1	12	0
鉱	0545	dʑjwu	1_02	人	03.06B.1	13	0
喬	5856	ɣa	2_14	P.	03.06B.1	14	0
贍	5148	dʑji.	2_60	罪	03.06B.1	15	0
堪	5670	o	1_49	有	03.06B.2	1	0
組	1278	.jɨ	2_28	謂	03.06B.2	2	0
蛇	0824	tɕhjɨ	2_27	立	03.06B.2	3	0
泳	5417	rjar	2_74	即	03.06B.2	4	0
島	1685	khjĩ	1_16	琴	03.06B.2	5	0
擘	3406	pju.	2_52	殿	03.06B.2	6	0
謎	1778	.ju	2_02	前	03.06B.2	7	0
鰻	5397	xjwɨ.j	2_55	懸	03.06B.2	8	0
甄	4069	pjwɨɨr	1_92	諫	03.06B.2	9	0
溌	1910	tjɨ.j	2_55	禮	03.06B.2	10	0
嫉	0795	rjɨr	2_77	D1	03.06B.2	11	0
豕	5113	.wji	1_10	為1	03.06B.2	12	0
恍	3200	tɕhjiw	1_46	六	03.06B.2	13	0
妲	2937	lhji.j	0	國	03.06B.2	14	0
弋	3139	ɕjij	1_35	代	03.06B.2	15	0
假	2541	dzjwo	2_44	人	03.06B.3	1	0
攻	0508	ŋwu	2_01	是	03.06B.3	2	0
餐	0707	tɕjiw	1_45	周	03.06B.4	1	0
軅	5218	tɕhjwo	1_48	昌	03.06B.4	2	0
仆	2489	phej	2_30	沛	03.06B.4	3	0
妲	2937	lhji.j	0	國	03.06B.4	4	0
假	2541	dzjwo	2_44	人	03.06B.4	5	0
攻	0508	ŋwu	2_01	是	03.06B.4	6	0
温	5493	xã	2_22	漢	03.06B.4	7	0
部	2074	kew	1_43	高	03.06B.4	8	0
洙	3788	tsu	2_01	祖	03.06B.4	9	0
弋	3139	ɕjij	1_35	代	03.06B.4	10	0
磁	0775	giuu	1_07	御	03.06B.4	11	0
延	5442	ɕiə	1_28	史	03.06B.4	12	0
升	0959	thej	1_33	大	03.06B.4	13	0
廏	3118	xu	1_01	夫	03.06B.4	14	0
豕	5113	.wji	1_10	為1	03.06B.4	15	0
部	2074	kew	1_43	高	03.06B.5	1	0
洙	3788	tsu	2_01	祖	03.06B.5	2	0
侖	2513	.ju	2_02	常	03.06B.5	3	0
吏	2455	gji	2_10	妻	03.06B.5	4	0
瞥	2129	bjij	2_33	妻	03.06B.5	5	0
荘	1319	tshji	1_11	戚	03.06B.5	6	0
候	0477	zjɨ.	1_69	氏	03.06B.5	7	0
衫	4950	rjir	2_72	P.	03.06B.5	8	0
槐	3627	nji	2_10	悄	03.06B.5	9	1
槐	3627	nji	2_10	悄	03.06B.5	10	0
刃	1097	.u	2_01	戲	03.06B.5	11	0
計	5993	kha	1_17	中	03.06B.5	12	0
餐	0707	tɕjiw	1_45	周	03.06B.5	13	0
軅	5218	tɕhjwo	1_48	昌	03.06B.5	14	0
閏	5402	khjij	2_33	至	03.06B.5	15	0
税	1183	da.	2_56	事	03.06B.6	1	0
巡	0930	dju	1_03	有1	03.06B.6	2	0
亳	2484	nioow	1_57	故	03.06B.6	3	0
部	2074	kew	1_43	高	03.06B.6	4	0
洙	3788	tsu	2_01	祖	03.06B.6	5	0
幃	3099	dʑjiij	1_39	居	03.06B.6	6	0
演	5447	do	2_42	P.	03.06B.6	7	0
嫉	0795	rjɨr	2_77	D1	03.06B.6	8	0
友	2373	lji.j	2_54	來	03.06B.6	9	0
閏	5402	khjij	2_33	至	03.06B.6	10	0
関	5712	dʑjwa	1_19	終	03.06B.6	11	0
嘛	2797	lho	0	出	03.06B.6	12	0
甚	1101	.jij	1_36	FUT	03.06B.6	13	0
賛	0705	zji.j	1_61	時	03.06B.6	14	0
部	2074	kew	1_43	高	03.06B.6	15	0
洙	3788	tsu	2_01	祖	03.06B.7	1	0
瑰	4047	rewr	2_78	足	03.06B.7	2	0
珱	4058	.jɨj	2_37	襪	03.06B.7	3	0
閥	1918	mji	1_11	不	03.06B.7	4	0
袵	4956	zji.	2_60	穿	03.06B.7	5	0
仰	5880	ŋwu	2_01	而	03.06B.7	6	0
餐	0707	tɕjiw	1_45	周	03.06B.7	7	0
軅	5218	tɕhjwo	1_48	昌	03.06B.7	8	0
杉	1139	.jij	1_36	P.	03.06B.7	9	0
篠	0804	djɨ	2_28	D1	03.06B.7	10	0
気	5754	lju	2_03	捕1	03.06B.7	11	0
蝠	4895	ljwi.j	1_61	頸	03.06B.7	12	0
顔	0089	tɕhjaa	1_21	P.	03.06B.7	13	0
余	2396	dzuu	2_05	坐	03.06B.7	14	0
豕	5113	.wji	1_10	為1	03.06B.7	15	0
譲	1045	da.	2_56	曰	03.07A.1	1	0
組	1278	.jɨ	2_28	謂	03.07A.1	2	0
噴	2098	ŋa	2_14	1sg	03.07A.1	3	0
虻	5306	dzjwɨ	1_30	君	03.07A.1	4	0
豕	5113	.wji	1_10	為1	03.07A.1	5	0
頃	0582	thjij	2_33	何	03.07A.1	6	0
悃	3211	sjo	2_44	云	03.07A.1	7	0
組	1278	.jɨ	2_28	謂	03.07A.1	8	0
餐	0707	tɕjiw	1_45	周	03.07A.1	9	0
軅	5218	tɕhjwo	1_48	昌	03.07A.1	10	0
譲	1045	da.	2_56	曰	03.07A.1	11	0
晃	0510	ŋwər	1_84	皇	03.07A.1	12	0
虻	5306	dzjwɨ	1_30	帝	03.07A.1	13	0
猊	4005	kha	2_17	桀	03.07A.1	14	0
株	5646	tɕhjiw	2_40	紂	03.07A.1	15	0
虻	5306	dzjwɨ	1_30	君	03.07A.2	1	0
偶	0290	sju	2_03	如	03.07A.2	2	0
肅	4601	nja	2_17	2SG	03.07A.2	3	0
哀	5285	ljɨ	1_29	也	03.07A.2	4	0
組	1278	.jɨ	2_28	謂	03.07A.2	5	0
虻	5306	dzjwɨ	1_30	君	03.07A.2	6	0
笄	4342	dja	2_17	D1	03.07A.2	7	0
躯	5921	zar	2_73	恥	03.07A.2	8	0
詮	1245	.jij	1_36	自	03.07A.2	9	0
血	0374	lhjii	1_14	退	03.07A.2	10	0
郁	5354	thjɨ	2_28	此	03.07A.2	11	0
税	1183	da.	2_56	事	03.07A.2	12	0
粉	2104	ɕji	1_10	先	03.07A.2	13	0
温	5493	xã	2_22	漢	03.07A.2	14	0
弋	3139	ɕjij	1_35	代	03.07A.2	15	0
蔡	4797	.jwɨr	2_77	文	03.07A.3	1	0
計	5993	kha	1_17	中	03.07A.3	2	0
赫	5612	tshjiij	1_39	說1	03.07A.3	3	0
訟	1013	tɕju	1_02	朱	03.07A.4	1	0
廖	3119	.ji	1_11	雲	03.07A.4	2	0
畑	1906	nioow	1_57	後	03.07A.4	3	0
剳	2639	mjiij	2_35	名	03.07A.4	4	0
具	5925	tsə	1_27	字	03.07A.4	5	0
症	0997	.jiw	2_40	游	03.07A.4	6	0
組	1278	.jɨ	2_28	謂	03.07A.4	7	0
梭	3566	lu	2_01	魯	03.07A.4	8	0
妲	2937	lhji.j	0	國	03.07A.4	9	0
假	2541	dzjwo	2_44	人	03.07A.4	10	0
攻	0508	ŋwu	2_01	是	03.07A.4	11	0
具	5925	tsə	1_27	字	03.07A.4	12	0
症	0997	.jiw	2_40	游	03.07A.4	13	0
虻	5306	dzjwɨ	1_30	君	03.07A.4	14	0
演	5447	do	2_42	P.	03.07A.4	15	0
譲	1045	da.	2_56	曰	03.07A.5	1	0
組	1278	.jɨ	2_28	謂	03.07A.5	2	0
朞	3508	bji	2_10	臣	03.07A.5	3	0
杉	1139	.jij	1_36	P.	03.07A.5	4	0
噫	2806	zur	2_69	敕	03.07A.5	5	0
躋	5205	ɣa.	1_63	劒	03.07A.5	6	0
篠	0804	djɨ	2_28	D1	03.07A.5	7	0
樺	5644	khjɨj	1_42	與2	03.07A.5	8	0
篤	1746	ljoor	1_94	諂	03.07A.5	9	0
朞	3508	bji	2_10	臣	03.07A.5	10	0
假	2541	dzjwo	2_44	人	03.07A.5	11	0
誇	0448	gjɨ	2_28	一	03.07A.5	12	0
杉	1139	.jij	1_36	P.	03.07A.5	13	0
砠	4225	sja	1_20	殺	03.07A.5	14	0
縅	4481	ɕjɨ	1_29	往2	03.07A.5	15	0
噴	2098	ŋa	2_14	1SG	03.07A.6	1	0
組	1278	.jɨ	2_28	謂	03.07A.6	2	0
虻	5306	dzjwɨ	1_30	君	03.07A.6	3	0
譲	1045	da.	2_56	曰	03.07A.6	4	0
狐	0441	sjwɨ	1_30	誰	03.07A.6	5	0
攻	0508	ŋwu	2_01	是	03.07A.6	6	0
組	1278	.jɨ	2_28	謂	03.07A.6	7	0
具	5925	tsə	1_27	字	03.07A.6	8	0
症	0997	.jiw	2_40	游	03.07A.6	9	0
譲	1045	da.	2_56	曰	03.07A.6	10	0
剰	1030	tɕjow	1_56	張	03.07A.6	11	0
磁	0775	giuu	1_07	禹	03.07A.6	12	0
攻	0508	ŋwu	2_01	是	03.07A.6	13	0
組	1278	.jɨ	2_28	謂	03.07A.6	14	0
虻	5306	dzjwɨ	1_30	君	03.07A.6	15	0
捌	0685	ŋa.	2_56	大	03.07A.7	1	1
捌	0685	ŋa.	2_56	大	03.07A.7	2	0
藷	0945	tshja.	1_64	怒	03.07A.7	3	0
仰	5880	ŋwu	2_01	而	03.07A.7	4	0
譲	1045	da.	2_56	曰	03.07A.7	5	0
組	1278	.jɨ	2_28	謂	03.07A.7	6	0
省	0998	dzjiij	2_35	師	03.07A.7	7	0
区	0276	no	2_42	子	03.07A.7	8	0
牌	1857	.jijr	2_68	斬	03.07A.7	9	0
搜	3357	kie.j	2_53	欲	03.07A.7	10	0
棘	3583	tja	1_20	者	03.07A.7	11	0
玖	5918	sjɨ	1_30	死2	03.07A.7	12	0
贍	5148	dʑji.	2_60	罪	03.07A.7	13	0
攻	0508	ŋwu	2_01	是	03.07A.7	14	0
萄	1734	tji	1_11	勿	03.07A.7	15	0
吃	5791	.wja.	2_57	放	03.07B.1	1	0
肅	4601	nja	2_17	2SG	03.07B.1	2	0
組	1278	.jɨ	2_28	謂	03.07B.1	3	0
蛇	0824	tɕhjɨ	2_27	立	03.07B.1	4	0
泳	5417	rjar	2_74	即	03.07B.1	5	0
沙	0607	mjɨr	1_86	人	03.07B.1	6	0
檀	1467	khjow	1_56	強	03.07B.1	7	0
遭	1326	kjɨ	1_30	D1	03.07B.1	8	0
胸	5871	zeew	2_41	遣	03.07B.1	9	0
擘	3406	pju.	2_52	殿	03.07B.1	10	0
謎	1778	.ju	2_02	前	03.07B.1	11	0
齋	4269	tɕhjij	1_35	持	03.07B.1	12	0
視	0749	phji	1_11	使1	03.07B.1	13	0
砠	4225	sja	1_20	殺	03.07B.1	14	0
甚	1101	.jij	1_36	FUT	03.07B.1	15	0
賛	0705	zji.j	1_61	時	03.07B.2	1	0
訟	1013	tɕju	1_02	朱	03.07B.2	2	0
廖	3119	.ji	1_11	雲	03.07B.2	3	0
椛	5643	mjɨ	1_30	不	03.07B.2	4	0
轡	0303	dʑjij	0	肯	03.07B.2	5	0
擘	3406	pju.	2_52	殿	03.07B.2	6	0
謎	1778	.ju	2_02	前	03.07B.2	7	0
磴	4250	sji	1_11	木	03.07B.2	8	0
嗟	2787	tu.	1_58	網	03.07B.2	9	0
遭	1326	kjɨ	1_30	D1	03.07B.2	10	0
籟	4401	zow	2_47	持	03.07B.2	11	0
桂	5981	.a	0	D1	03.07B.2	12	0
始	0721	lhji.	2_60	折	03.07B.2	13	0
表	2019	thja	1_20	此	03.07B.2	14	0
棔	3589	dzjɨj	1_42	時	03.07B.2	15	0
絛	4456	lji.j	2_54	大	03.07B.3	1	0
朞	3508	bji	2_10	臣	03.07B.3	2	0
孝	0493	sjɨ	2_28	辛	03.07B.3	3	0
帑	3094	khjij	1_36	慶	03.07B.3	4	0
蕀	4807	khji	1_11	忌	03.07B.3	5	0
甄	4069	pjwɨɨr	1_92	諫	03.07B.3	6	0
譲	1045	da.	2_56	曰	03.07B.3	7	0
晃	0510	ŋwər	1_84	皇	03.07B.3	8	0
虻	5306	dzjwɨ	1_30	帝	03.07B.3	9	0
冬	1677	lji.	2_60	恩	03.07B.3	10	0
冂	2590	.wjɨ	2_27	D1	03.07B.3	11	0
泡	2180	dʑjɨɨr	1_92	施	03.07B.3	12	0
肅	4601	nja	2_17	2SG	03.07B.3	13	0
訟	1013	tɕju	1_02	朱	03.07B.3	14	0
廖	3119	.ji	1_11	雲	03.07B.3	15	0
杉	1139	.jij	1_36	之	03.07B.4	1	0
譲	1045	da.	2_56	言	03.07B.4	2	0
棘	3583	tja	1_20	者	03.07B.4	3	0
佃	1569	twu.	1_58	直	03.07B.4	4	0
哀	5285	ljɨ	1_29	也	03.07B.4	5	0
晃	0510	ŋwər	1_84	皇	03.07B.4	6	0
虻	5306	dzjwɨ	1_30	帝	03.07B.4	7	0
冂	2590	.wjɨ	2_27	D1	03.07B.4	8	0
隅	0293	dze	2_07	察	03.07B.4	9	0
組	1278	.jɨ	2_28	謂	03.07B.4	10	0
虻	5306	dzjwɨ	1_30	帝	03.07B.4	11	0
悉	0797	phji	1_11	謀	03.07B.4	12	0
冂	2590	.wjɨ	2_27	D1	03.07B.4	13	0
血	0374	lhjii	1_14	退	03.07B.4	14	0
蛇	0824	tɕhjɨ	2_27	立	03.07B.4	15	0
泳	5417	rjar	2_74	即	03.07B.5	1	0
笄	4342	dja	2_17	D1	03.07B.5	2	0
吃	5791	.wja.	2_57	放	03.07B.5	3	0
竒	2920	ʑjɨ.	1_69	左	03.07B.5	4	0
偖	2547	tɕier	1_78	右	03.07B.5	5	0
假	2541	dzjwo	2_44	人	03.07B.5	6	0
擘	3406	pju.	2_52	殿	03.07B.5	7	0
寸	1147	dji.	2_60	修1	03.07B.5	8	0
友	2373	lji.j	2_54	來	03.07B.5	9	0
虻	5306	dzjwɨ	1_30	帝	03.07B.5	10	0
譲	1045	da.	2_56	曰	03.07B.5	11	0
萄	1734	tji	1_11	勿	03.07B.5	12	0
寸	1147	dji.	2_60	修1	03.07B.5	13	0
蜉	4884	nji	2_10	2PL	03.07B.5	14	0
組	1278	.jɨ	2_28	謂	03.07B.5	15	0
朞	3508	bji	2_10	臣	03.07B.6	1	0
杉	1139	.jij	1_36	之	03.07B.6	2	0
佃	1569	twu.	1_58	直	03.07B.6	3	0
捕	2149	dʑju	1_02	顯	03.07B.6	4	0
瀘	3916	sji	2_10	NOM	03.07B.6	5	0
蘓	4841	djij	2_33	D2	03.07B.6	6	0
撲	2226	.we	2_07	為	03.07B.6	7	0
組	1278	.jɨ	2_28	謂	03.07B.6	8	0
温	5493	xã	2_22	漢	03.07B.6	9	0
砿	0546	.u	2_01	武	03.07B.6	10	0
虻	5306	dzjwɨ	1_30	帝	03.07B.6	11	0
弋	3139	ɕjij	1_35	代	03.07B.6	12	0
假	2541	dzjwo	2_44	人	03.07B.6	13	0
攻	0508	ŋwu	2_01	是	03.07B.6	14	0
郁	5354	thjɨ	2_28	此	03.07B.6	15	0
税	1183	da.	2_56	事	03.07B.7	1	0
温	5493	xã	2_22	漢	03.07B.7	2	0
弋	3139	ɕjij	1_35	代	03.07B.7	3	0
蔡	4797	.jwɨr	2_77	文	03.07B.7	4	0
計	5993	kha	1_17	中	03.07B.7	5	0
赫	5612	tshjiij	1_39	說1	03.07B.7	6	0
俵	2012	tũ	1_96	董	03.08A.1	1	0
多	1363	sjwa	1_20	宣	03.08A.1	2	0
畑	1906	nioow	1_57	後	03.08A.1	3	0
剳	2639	mjiij	2_35	名	03.08A.1	4	0
藉	4830	ɕjaa	2_18	少	03.08A.1	5	0
洵	3789	phjij	1_36	平	03.08A.1	6	0
組	1278	.jɨ	2_28	謂	03.08A.1	7	0
屈	0298	tɕhjĩ	1_16	陳	03.08A.1	8	0
迚	5259	ljiw	1_45	留	03.08A.1	9	0
刮	2627	ljɨ.	2_61	地	03.08A.1	10	0
辷	5258	.io.	1_71	方	03.08A.1	11	0
假	2541	dzjwo	2_44	人	03.08A.1	12	0
攻	0508	ŋwu	2_01	是	03.08A.1	13	0
娑	2946	ko	1_49	光	03.08A.1	14	0
砿	0546	.u	2_01	武	03.08A.1	15	0
弋	3139	ɕjij	1_35	代	03.08A.2	1	0
苻	4710	lo	1_49	洛	03.08A.2	2	0
譎	5087	.jow	1_57	陽	03.08A.2	3	0
刮	2627	ljɨ.	2_61	地	03.08A.2	4	0
辷	5258	.io.	1_71	方	03.08A.2	5	0
孚	2983	.u	2_01	中	03.08A.2	6	0
噐	2800	xjwã	1_26	縣	03.08A.2	7	0
迹	5267	ljɨj	1_42	令	03.08A.2	8	0
豕	5113	.wji	1_10	為1	03.08A.2	9	0
蚌	4861	zjo.	2_64	時	03.08A.2	10	0
虻	5306	dzjwɨ	1_30	皇	03.08A.2	11	0
澹	3894	njɨ	1_30	姑	03.08A.2	12	0
晃	0510	ŋwər	1_84	公	03.08A.2	13	0
会	5549	tɕhjiw	2_40	主	03.08A.2	14	0
頬	2221	.wə.	1_31	屬	03.08A.2	15	0
歎	1449	tɕhjwor	2_81	僕	03.08A.3	1	0
格	5604	dʑjɨ	0	ERG	03.08A.3	2	0
豕	5113	.wji	1_10	ERG	03.08A.3	3	0
頼	2440	njɨɨ	2_29	日	03.08A.3	4	0
濁	1421	zjɨ.	1_69	晝	03.08A.3	5	0
假	2541	dzjwo	2_44	人	03.08A.3	6	0
誇	0448	gjɨ	2_28	一	03.08A.3	7	0
笄	4342	dja	2_17	D1	03.08A.3	8	0
砠	4225	sja	1_20	殺	03.08A.3	9	0
孤	0433	bju	1_03	P.	03.08A.3	10	0
晃	0510	ŋwər	1_84	公	03.08A.3	11	0
会	5549	tɕhjiw	2_40	主	03.08A.3	12	0
垪	2862	nji	1_11	居	03.08A.3	13	0
演	5447	do	2_42	P.	03.08A.3	14	0
遭	1326	kjɨ	1_30	D1	03.08A.3	15	0
樵	0989	piəj	2_36	逃	03.08A.4	1	0
俵	2012	tũ	1_96	董	03.08A.4	2	0
多	1363	sjwa	1_20	宣	03.08A.4	3	0
觴	5026	mji	1_11	聞1	03.08A.4	4	0
畑	1906	nioow	1_57	後	03.08A.4	5	0
竒	2920	ʑjɨ.	1_69	左	03.08A.4	6	0
偖	2547	tɕier	1_78	右	03.08A.4	7	0
假	2541	dzjwo	2_44	人	03.08A.4	8	0
胸	5871	zeew	2_41	遣	03.08A.4	9	0
苻	4710	lo	1_49	洛	03.08A.4	10	0
譎	5087	.jow	1_57	陽	03.08A.4	11	0
脾	4625	mjiij	2_35	尾	03.08A.4	12	0
喬	5856	ɣa	2_14	P.	03.08A.4	13	0
遭	1326	kjɨ	1_30	D1	03.08A.4	14	0
花	5522	ljiij	2_35	待1	03.08A.4	15	0
視	0749	phji	1_11	使1	03.08A.5	1	0
蛇	0824	tɕhjɨ	2_27	立	03.08A.5	2	0
泳	5417	rjar	2_74	即	03.08A.5	3	0
晃	0510	ŋwər	1_84	公	03.08A.5	4	0
会	5549	tɕhjiw	2_40	主	03.08A.5	5	0
歎	1449	tɕhjwor	2_81	僕	03.08A.5	6	0
杉	1139	.jij	1_36	P.	03.08A.5	7	0
冂	2590	.wjɨ	2_27	D1	03.08A.5	8	0
嘛	2797	lho	0	出	03.08A.5	9	0
吹	1115	gjij	1_36	馬	03.08A.5	10	0
謎	1778	.ju	2_02	前	03.08A.5	11	0
繪	4507	ɕio	1_50	引	03.08A.5	12	0
俵	2012	tũ	1_96	董	03.08A.5	13	0
多	1363	sjwa	1_20	宣	03.08A.5	14	0
歎	1449	tɕhjwor	2_81	僕	03.08A.5	15	0
杉	1139	.jij	1_36	P.	03.08A.6	1	0
贇	5146	bju	2_03	召	03.08A.6	2	0
字	0764	rjijr	1_74	馬	03.08A.6	3	0
顔	0089	tɕhjaa	1_21	P.	03.08A.6	4	0
炭	1452	nja	1_20	D1	03.08A.6	5	0
権	0394	lhji.	2_60	下	03.08A.6	6	0
視	0749	phji	1_11	使1	03.08A.6	7	0
汗	5688	.wa	2_14	何	03.08A.6	8	0
亳	2484	nioow	1_57	故	03.08A.6	9	0
假	2541	dzjwo	2_44	人	03.08A.6	10	0
砠	4225	sja	1_20	殺	03.08A.6	11	0
肅	4601	nja	2_17	2SG	03.08A.6	12	0
組	1278	.jɨ	2_28	謂	03.08A.6	13	0
晃	0510	ŋwər	1_84	公	03.08A.6	14	0
会	5549	tɕhjiw	2_40	主	03.08A.6	15	0
絛	4456	lji.j	2_54	大	03.08A.7	1	0
藷	0945	tshja.	1_64	怒	03.08A.7	2	0
虻	5306	dzjwɨ	1_30	帝	03.08A.7	3	0
演	5447	do	2_42	P.	03.08A.7	4	0
遭	1326	kjɨ	1_30	D1	03.08A.7	5	0
囗	2830	dju	1_03	告	03.08A.7	6	0
虻	5306	dzjwɨ	1_30	帝	03.08A.7	7	0
俵	2012	tũ	1_96	董	03.08A.7	8	0
多	1363	sjwa	1_20	宣	03.08A.7	9	0
杉	1139	.jij	1_36	P.	03.08A.7	10	0
砠	4225	sja	1_20	殺	03.08A.7	11	0
搜	3357	kie.j	2_53	欲	03.08A.7	12	0
俵	2012	tũ	1_96	董	03.08A.7	13	0
多	1363	sjwa	1_20	宣	03.08A.7	14	0
譲	1045	da.	2_56	曰	03.08A.7	15	0
朞	3508	bji	2_10	臣	03.08B.1	1	0
譲	1045	da.	2_56	曰	03.08B.1	2	0
桂	5981	.a	0	一	03.08B.1	3	0
恪	3195	gjwi	2_10	句	03.08B.1	4	0
嫉	0795	rjɨr	2_77	D1	03.08B.1	5	0
赫	5612	tshjiij	1_39	說1	03.08B.1	6	0
視	0749	phji	1_11	使1	03.08B.1	7	0
噴	2098	ŋa	2_14	1SG	03.08B.1	8	0
賛	0705	zji.j	1_61	時	03.08B.1	9	0
玖	5918	sjɨ	1_30	死2	03.08B.1	10	0
蘓	4841	djij	2_33	D2	03.08B.1	11	0
秡	4279	.wəə	1_31	服	03.08B.1	12	0
噴	2098	ŋa	2_14	1SG	03.08B.1	13	0
組	1278	.jɨ	2_28	謂	03.08B.1	14	0
虻	5306	dzjwɨ	1_30	帝	03.08B.1	15	0
譲	1045	da.	2_56	曰	03.08B.2	1	0
汗	5688	.wa	2_14	何	03.08B.2	2	0
爲	3974	tshjii	2_12	說2	03.08B.2	3	0
肅	4601	nja	2_17	2SG	03.08B.2	4	0
組	1278	.jɨ	2_28	謂	03.08B.2	5	0
孱	3027	ku.	2_51	答	03.08B.2	6	0
晃	0510	ŋwər	1_84	皇	03.08B.2	7	0
虻	5306	dzjwɨ	1_30	帝	03.08B.2	8	0
歎	1449	tɕhjwor	2_81	僕	03.08B.2	9	0
簷	5022	ljɨ	1_29	威	03.08B.2	10	0
並	2118	ɕjow	2_48	????	03.08B.2	11	0
視	0749	phji	1_11	使1	03.08B.2	12	0
仰	5880	ŋwu	2_01	而	03.08B.2	13	0
假	2541	dzjwo	2_44	人	03.08B.2	14	0
捌	0685	ŋa.	2_56	善	03.08B.2	15	0
杉	1139	.jij	1_36	P.	03.08B.3	1	0
砠	4225	sja	1_20	殺	03.08B.3	2	0
棘	3583	tja	1_20	者	03.08B.3	3	0
妲	2937	lhji.j	0	國	03.08B.3	4	0
頃	0582	thjij	2_33	何	03.08B.3	5	0
悃	3211	sjo	2_44	云	03.08B.3	6	0
士	0720	mjii	2_12	治2	03.08B.3	7	0
豕	5113	.wji	1_10	為1	03.08B.3	8	0
朞	3508	bji	2_10	臣	03.08B.3	9	0
詮	1245	.jij	1_36	自	03.08B.3	10	1
詮	1245	.jij	1_36	自	03.08B.3	11	0
砠	4225	sja	1_20	殺	03.08B.3	12	0
搜	3357	kie.j	2_53	欲	03.08B.3	13	0
組	1278	.jɨ	2_28	謂	03.08B.3	14	0
蛇	0824	tɕhjɨ	2_27	立	03.08B.3	15	0
泳	5417	rjar	2_74	即	03.08B.4	1	0
哦	2750	ɣu	1_04	頭	03.08B.4	2	0
擘	3406	pju.	2_52	殿	03.08B.4	3	0
謎	1778	.ju	2_02	前	03.08B.4	4	0
辿	1435	tsewr	2_78	觸	03.08B.4	5	0
咆	2734	sjij	1_36	血	03.08B.4	6	0
皎	4161	lju.	1_59	流	03.08B.4	7	0
接	1204	njijr	2_68	面	03.08B.4	8	0
跫	5171	sə	1_27	滿	03.08B.4	9	0
虻	5306	dzjwɨ	1_30	帝	03.08B.4	10	0
彫	1526	tshji	2_10	侍	03.08B.4	11	0
淙	3818	mjijr	2_68	者	03.08B.4	12	0
漢	5689	ɣa	1_17	門	03.08B.4	13	0
腎	1103	nər	2_76	黃	03.08B.4	14	0
沐	3766	zji	1_11	小	03.08B.4	15	0
縋	4489	phjii	1_14	使	03.08B.5	1	0
俵	2012	tũ	1_96	董	03.08B.5	2	0
多	1363	sjwa	1_20	宣	03.08B.5	3	0
演	5447	do	2_42	P.	03.08B.5	4	0
檎	0465	tɕjɨj	1_42	遣	03.08B.5	5	0
豕	5113	.wji	1_10	為1	03.08B.5	6	0
晃	0510	ŋwər	1_84	公	03.08B.5	7	0
会	5549	tɕhjiw	2_40	主	03.08B.5	8	0
演	5447	do	2_42	P.	03.08B.5	9	0
贍	5148	dʑji.	2_60	罪	03.08B.5	10	0
遭	1326	kjɨ	1_30	D1	03.08B.5	11	0
跣	5173	dʑjɨ.	0	拔	03.08B.5	12	0
縅	4481	ɕjɨ	1_29	往2	03.08B.5	13	0
肅	4601	nja	2_17	2SG	03.08B.5	14	0
組	1278	.jɨ	2_28	謂	03.08B.5	15	0
俵	2012	tũ	1_96	董	03.08B.6	1	0
多	1363	sjwa	1_20	宣	03.08B.6	2	0
閥	1918	mji	1_11	不	03.08B.6	3	0
梠	3575	nji	2_10	聽2	03.08B.6	4	0
虻	5306	dzjwɨ	1_30	帝	03.08B.6	5	0
假	2541	dzjwo	2_44	人	03.08B.6	6	0
胸	5871	zeew	2_41	遣	03.08B.6	7	0
朧	3510	.jijr	1_74	強	03.08B.6	8	0
仰	5880	ŋwu	2_01	而	03.08B.6	9	0
恵	0333	ŋwer	2_71	膝	03.08B.6	10	0
曚	3498	ɣor	2_80	屈	03.08B.6	11	0
勵	2663	kjwɨ	1_69	跪	03.08B.6	12	0
視	0749	phji	1_11	使1	03.08B.6	13	0
炭	1452	nja	1_20	D1	03.08B.6	14	0
覃	5007	gjur	2_70	卧	03.08B.6	15	0
閥	1918	mji	1_11	不	03.08B.7	1	0
賦	2064	.wor	1_89	起	03.08B.7	2	0
晃	0510	ŋwər	1_84	公	03.08B.7	3	0
会	5549	tɕhjiw	2_40	主	03.08B.7	4	0
俵	2012	tũ	1_96	董	03.08B.7	5	0
多	1363	sjwa	1_20	宣	03.08B.7	6	0
閥	1918	mji	1_11	不	03.08B.7	7	0
勵	2663	kjwɨ	1_69	跪	03.08B.7	8	0
款	0046	ljij	2_33	見1	03.08B.7	9	0
畑	1906	nioow	1_57	後	03.08B.7	10	0
係	0322	tɕhjwo	1_48	故	03.08B.7	11	0
虻	5306	dzjwɨ	1_30	帝	03.08B.7	12	0
杉	1139	.jij	1_36	P.	03.08B.7	13	0
粘	1822	ŋwuu	1_05	曰	03.08B.7	14	0
烱	3926	nja	2_17	汝	03.08B.7	15	0
姐	5305	.wjij	2_32	叔	03.09A.1	1	0
秒	2025	sjwi	1_11	貧	03.09A.1	2	0
卿	0214	lu	2_51	窮	03.09A.1	3	0
咀	2730	khwa	2_14	布	03.09A.1	4	0
蝣	4906	gjwi	2_10	着1	03.09A.1	5	0
蚌	4861	zjo.	2_64	時	03.09A.1	6	0
求	5815	tsjɨ	1_30	亦	03.09A.1	7	0
玖	5918	sjɨ	1_30	死2	03.09A.1	8	0
贍	5148	dʑji.	2_60	罪	03.09A.1	9	0
庚	0500	tsju.	1_59	犯	03.09A.1	10	0
淙	3818	mjijr	2_68	者	03.09A.1	11	0
假	2541	dzjwo	2_44	人	03.09A.1	12	0
純	0929	dʑjij	1_35	純	03.09A.1	13	0
爆	1892	mjii	1_14	宫	03.09A.1	14	0
孚	2983	.u	2_01	中	03.09A.1	15	0
慎	1071	dzjuu	2_06	匿	03.09A.2	1	0
叭	2708	rjar	1_82	司	03.09A.2	2	0
孚	2983	.u	2_01	中	03.09A.2	3	0
贇	5146	bju	2_03	召	03.09A.2	4	0
淙	3818	mjijr	2_68	者	03.09A.2	5	0
漢	5689	ɣa	1_17	戶	03.09A.2	6	0
識	0785	bju	2_02	邊	03.09A.2	7	0
遭	1326	kjɨ	1_30	D1	03.09A.2	8	0
匡	0213	njij	1_36	近	03.09A.2	9	0
椛	5643	mjɨ	1_30	不	03.09A.2	10	0
釘	1617	kjir	2_72	敢	03.09A.2	11	0
廸	3133	sjij	1_36	今	03.09A.2	12	0
玻	4028	nji	2_10	汝	03.09A.2	13	0
朿	3513	mə	1_27	天	03.09A.2	14	0
耶	2349	zjɨ.	1_69	子	03.09A.2	15	0
嫉	0795	rjɨr	2_77	D1	03.09A.3	1	0
豕	5113	.wji	1_10	為1	03.09A.3	2	0
頃	0582	thjij	2_33	何	03.09A.3	3	0
悃	3211	sjo	2_44	云	03.09A.3	4	0
郁	5354	thjɨ	2_28	此	03.09A.3	5	0
假	2541	dzjwo	2_44	人	03.09A.3	6	0
一	5356	tji.j	1_61	獨	03.09A.3	7	0
杉	1139	.jij	1_36	P.	03.09A.3	8	0
貽	5130	rjur	1_76	降	03.09A.3	9	0
速	1346	0	2_73	伏	03.09A.3	10	0
椛	5643	mjɨ	1_30	不	03.09A.3	11	0
凾	2620	njwi	2_10	能	03.09A.3	12	0
組	1278	.jɨ	2_28	謂	03.09A.3	13	0
虻	5306	dzjwɨ	1_30	帝	03.09A.3	14	0
譲	1045	da.	2_56	曰	03.09A.3	15	0
朿	3513	mə	1_27	天	03.09A.4	1	0
耶	2349	zjɨ.	1_69	子	03.09A.4	2	0
邇	5264	mjijr	1_74	庸	03.09A.4	3	0
假	2541	dzjwo	2_44	人	03.09A.4	4	0
衫	4950	rjir	2_72	P.	03.09A.4	5	0
程	1608	ləw	2_38	同	03.09A.4	6	0
組	1278	.jɨ	2_28	謂	03.09A.4	7	0
蛇	0824	tɕhjɨ	2_27	立	03.09A.4	8	0
泳	5417	rjar	2_74	即	03.09A.4	9	0
俵	2012	tũ	1_96	董	03.09A.4	10	0
多	1363	sjwa	1_20	宣	03.09A.4	11	0
杉	1139	.jij	1_36	之	03.09A.4	12	0
厰	2698	tsjir	2_86	性	03.09A.4	13	0
朧	3510	.jijr	1_74	剛	03.09A.4	14	0
朞	3508	bji	2_10	臣	03.09A.4	15	0
剳	2639	mjiij	2_35	名	03.09A.5	1	0
桂	5981	.a	0	D1	03.09A.5	2	0
借	0826	thjɨ	1_30	召	03.09A.5	3	0
豕	5113	.wji	1_10	為1	03.09A.5	4	0
笄	4342	dja	2_17	D1	03.09A.5	5	0
慶	5974	.wji.j	2_54	放	03.09A.5	6	0
教	5865	so.	1_70	三	03.09A.5	7	0
紳	1084	ɣa.	2_56	十	03.09A.5	8	0
妾	0966	khjɨ	2_28	萬	03.09A.5	9	0
属	1348	sa	1_17	緡	03.09A.5	10	0
梯	1604	dzjɨj	1_42	錢	03.09A.5	11	0
笄	4342	dja	2_17	D1	03.09A.5	12	0
迅	1105	khjow	1_56	賜1	03.09A.5	13	0
郁	5354	thjɨ	2_28	此	03.09A.5	14	0
税	1183	da.	2_56	事	03.09A.5	15	0
佶	2503	ku.	1_55	後	03.09A.6	1	0
温	5493	xã	2_22	漢	03.09A.6	2	0
弋	3139	ɕjij	1_35	代	03.09A.6	3	0
蔡	4797	.jwɨr	2_77	文	03.09A.6	4	0
計	5993	kha	1_17	中	03.09A.6	5	0
赫	5612	tshjiij	1_39	說1	03.09A.6	6	0
剰	1030	tɕjow	1_56	張	03.09A.7	1	0
娑	2946	ko	1_49	鋼	03.09A.7	2	0
畑	1906	nioow	1_57	後	03.09A.7	3	0
剳	2639	mjiij	2_35	名	03.09A.7	4	0
堋	2872	.wẽ	1_15	文	03.09A.7	5	0
赱	5157	kji	1_11	紀	03.09A.7	6	0
組	1278	.jɨ	2_28	謂	03.09A.7	7	0
砿	0546	.u	2_01	武	03.09A.7	8	0
譎	5087	.jow	1_58	陽	03.09A.7	9	0
刮	2627	ljɨ.	2_61	地	03.09A.7	10	0
辷	5258	.io.	1_71	方	03.09A.7	11	0
假	2541	dzjwo	2_44	人	03.09A.7	12	0
攻	0508	ŋwu	2_01	是	03.09A.7	13	0
温	5493	xã	2_22	漢	03.09A.7	14	0
貼	1643	xwã	1_24	桓	03.09A.7	15	0
虻	5306	dzjwɨ	1_30	帝	03.09B.1	1	0
弋	3139	ɕjij	1_35	代	03.09B.1	2	0
椌	3587	pia	1_18	八	03.09B.1	3	0
綉	4455	tha	2_14	道	03.09B.1	4	0
延	5442	ɕiə	1_28	使	03.09B.1	5	0
遭	1326	kjɨ	1_30	D1	03.09B.1	6	0
胸	5871	zeew	2_41	遣	03.09B.1	7	0
表	2019	thja	1_20	此	03.09B.1	8	0
孤	0433	bju	1_03	P.	03.09B.1	9	0
刮	2627	ljɨ.	2_61	地	03.09B.1	10	0
辷	5258	.io.	1_71	方	03.09B.1	11	0
孚	2983	.u	2_01	中	03.09B.1	12	0
宵	0968	rjur	1_76	諸	03.09B.1	13	0
叭	2708	rjar	1_82	司	03.09B.1	14	0
垓	2858	zjir	2_72	長	03.09B.1	15	0
展	1638	gji	1_11	清	03.09B.2	1	0
舍	4672	njəj	1_41	濁	03.09B.2	2	0
系	5985	sjii	1_14	察	03.09B.2	3	0
棆	3606	.juu	1_07	觀	03.09B.2	4	0
豕	5113	.wji	1_10	為1	03.09B.2	5	0
旄	3454	tshjij	2_32	七	03.09B.2	6	0
綉	4455	tha	2_14	道	03.09B.2	7	0
延	5442	ɕiə	1_28	使	03.09B.2	8	0
犧	3990	khjɨ	1_30	足	03.09B.2	9	0
桂	5981	.a	0	D1	03.09B.2	10	0
萠	4762	tɕhjij	1_35	舉	03.09B.2	11	0
剰	1030	tɕjow	1_56	張	03.09B.2	12	0
娑	2946	ko	1_49	鋼	03.09B.2	13	0
一	5356	tji.j	1_61	獨	03.09B.2	14	0
閥	1918	mji	1_11	不	03.09B.2	15	0
縅	4481	ɕjɨ	1_29	往2	03.09B.3	1	0
碌	4233	ko	1_49	車	03.09B.3	2	0
侍	0762	dʑiej	2_31	輪	03.09B.3	3	0
子	0724	njɨ	2_28	等	03.09B.3	4	0
勣	2658	lə.	1_68	埋	03.09B.3	5	0
苻	4710	lo	1_49	洛	03.09B.3	6	0
譎	5087	.jow	1_58	陽	03.09B.3	7	0
妹	2247	tu	2_01	都	03.09B.3	8	0
湃	3836	thjij	2_33	亭	03.09B.3	9	0
刮	2627	ljɨ.	2_61	地	03.09B.3	10	0
辷	5258	.io.	1_71	方	03.09B.3	11	0
孚	2983	.u	2_01	中	03.09B.3	12	0
炭	1452	nja	1_20	D1	03.09B.3	13	0
云	5404	la	1_17	載	03.09B.3	14	0
譲	1045	da.	2_56	曰	03.09B.3	15	0
組	1278	.jɨ	2_28	謂	03.09B.4	1	0
盻	4181	khu	2_01	豺	03.09B.4	2	0
康	0501	ɕjwɨ	1_30	狼	03.09B.4	3	0
幃	3099	dʑjiij	1_39	居	03.09B.4	4	0
跚	5165	twu.	1_58	處	03.09B.4	5	0
売	1870	dʑiə	1_28	狐	03.09B.4	6	0
都	1666	nə	0	狸	03.09B.4	7	0
杉	1139	.jij	1_36	P.	03.09B.4	8	0
復	2082	.jɨr	1_86	問	03.09B.4	9	0
弗	2090	lew	2_38	所	03.09B.4	10	0
汗	5688	.wa	2_14	何	03.09B.4	11	0
堪	5670	o	1_49	有	03.09B.4	12	0
組	1278	.jɨ	2_28	謂	03.09B.4	13	0
虻	5306	dzjwɨ	1_30	帝	03.09B.4	14	0
譲	1045	da.	2_56	曰	03.09B.4	15	0
狐	0441	sjwɨ	1_30	誰	03.09B.5	1	0
攻	0508	ŋwu	2_01	是	03.09B.5	2	0
組	1278	.jɨ	2_28	謂	03.09B.5	3	0
剰	1030	tɕjow	1_56	張	03.09B.5	4	0
娑	2946	ko	1_49	鋼	03.09B.5	5	0
譲	1045	da.	2_56	曰	03.09B.5	6	0
絛	4456	lji.j	2_54	大	03.09B.5	7	0
朝	1531	gja	1_20	軍	03.09B.5	8	0
嘸	2805	bjuu	2_06	將	03.09B.5	9	0
桀	3554	ljow	1_56	梁	03.09B.5	10	0
赱	5157	kji	1_11	冀	03.09B.5	11	0
攻	0508	ŋwu	2_01	是	03.09B.5	12	0
組	1278	.jɨ	2_28	謂	03.09B.5	13	0
表	2019	thja	1_20	此	03.09B.5	14	0
頼	2440	njɨɨ	2_29	日	03.09B.5	15	0
虻	5306	dzjwɨ	1_30	帝	03.09B.6	1	0
格	5604	dʑjɨ	0	ERG	03.09B.6	2	0
豕	5113	.wji	1_10	ERG	03.09B.6	3	0
桀	3554	ljow	1_56	梁	03.09B.6	4	0
赱	5157	kji	1_11	冀	03.09B.6	5	0
杉	1139	.jij	1_36	P.	03.09B.6	6	0
笄	4342	dja	2_17	D1	03.09B.6	7	0
砠	4225	sja	1_20	殺	03.09B.6	8	0
視	0749	phji	1_11	使1	03.09B.6	9	0
畑	1906	nioow	1_57	後	03.09B.6	10	0
表	2019	thja	1_20	此	03.09B.6	11	0
棔	3589	dzjɨj	1_42	時	03.09B.6	12	0
娑	2946	ko	1_49	廣	03.09B.6	13	0
迹	5267	ljɨj	1_42	陵	03.09B.6	14	0
刮	2627	ljɨ.	2_61	地	03.09B.6	15	0
辷	5258	.io.	1_71	方	03.09B.7	1	0
孚	2983	.u	2_01	中	03.09B.7	2	0
泣	5817	kjwɨɨr	1_92	盜	03.09B.7	3	0
淙	3818	mjijr	2_68	者	03.09B.7	4	0
剰	1030	tɕjow	1_56	張	03.09B.7	5	0
抉	3323	ŋiaa	2_20	嬰	03.09B.7	6	0
格	5604	dʑjɨ	0	ERG	03.09B.7	7	0
豕	5113	.wji	1_10	ERG	03.09B.7	8	0
空	0289	.we	2_07	城	03.09B.7	9	0
慟	3266	dzju	2_03	主	03.09B.7	10	0
笄	4342	dja	2_17	D1	03.09B.7	11	0
砠	4225	sja	1_20	殺	03.09B.7	12	0
艢	4686	khjwã	1_26	郡	03.09B.7	13	0
刮	2627	ljɨ.	2_61	地	03.09B.7	14	0
辷	5258	.io.	1_71	方	03.09B.7	15	0
詮	1245	.jij	1_36	自	03.10A.1	1	0
籟	4401	zow	2_47	持	03.10A.1	2	0
欺	0139	nej	2_30	安	03.10A.1	3	0
栞	3551	niow	2_48	惡	03.10A.1	4	0
遭	1326	kjɨ	1_30	D1	03.10A.1	5	0
慟	3266	dzju	2_03	主	03.10A.1	6	0
佶	2503	ku.	1_55	後	03.10A.1	7	0
剰	1030	tɕjow	1_56	張	03.10A.1	8	0
抉	3323	ŋiaa	2_20	嬰	03.10A.1	9	0
子	0724	njɨ	2_28	等	03.10A.1	10	0
空	0289	.we	2_07	城	03.10A.1	11	0
漢	5689	ɣa	1_17	門	03.10A.1	12	0
碓	5390	phie	2_08	開	03.10A.1	13	0
嘛	2797	lho	0	出	03.10A.1	14	0
剰	1030	tɕjow	1_56	張	03.10A.1	15	0
娑	2946	ko	1_49	鋼	03.10A.2	1	0
杉	1139	.jij	1_36	P.	03.10A.2	2	0
瑕	4040	khjuu	1_06	迎	03.10A.2	3	0
徂	3159	lhji.j	2_54	受1	03.10A.2	4	0
哦	2750	ɣu	1_04	頭	03.10A.2	5	0
遭	1326	kjɨ	1_30	D1	03.10A.2	6	0
忸	3175	tji.	1_67	歸	03.10A.2	7	0
剰	1030	tɕjow	1_56	張	03.10A.2	8	0
娑	2946	ko	1_49	鋼	03.10A.2	9	0
粉	2104	ɕji	1_10	先	03.10A.2	10	0
笄	4342	dja	2_17	D1	03.10A.2	11	0
迪	5262	ŋewr	1_87	亂	03.10A.2	12	0
趺	5163	dʑjow	1_56	分	03.10A.2	13	0
整	1160	ka	2_14	離	03.10A.2	14	0
淙	3818	mjijr	2_68	者	03.10A.2	15	0
假	2541	dzjwo	2_44	人	03.10A.3	1	0
巷	0497	ŋewr	2_78	多	03.10A.3	2	0
釜	0010	zji	2_10	皆	03.10A.3	3	0
倖	0478	ɕioo	1_53	集	03.10A.3	4	0
藩	1941	dzjɨ.	2_61	集	03.10A.3	5	0
視	0749	phji	1_11	使1	03.10A.3	6	0
詮	1245	.jij	1_36	自	03.10A.3	7	0
跳	1543	mjor	1_90	親	03.10A.3	8	0
表	2019	thja	1_20	此	03.10A.3	9	0
子	0724	njɨ	2_28	等	03.10A.3	10	0
杉	1139	.jij	1_36	之	03.10A.3	11	0
幃	3099	dʑjiij	1_39	居	03.10A.3	12	0
鞄	5645	tji.	2_60	處	03.10A.3	13	0
楝	3622	kjɨɨr	2_85	屋	03.10A.3	14	0
僞	2560	.jɨj	2_37	屋	03.10A.3	15	0
嫉	0795	rjɨr	2_77	D1	03.10A.4	1	0
冂	2590	.wjɨ	2_27	D1	03.10A.4	2	0
豕	5113	.wji	1_10	為1	03.10A.4	3	0
詮	1245	.jij	1_36	自	03.10A.4	4	0
跚	5165	twu.	1_58	處	03.10A.4	5	0
玉	0248	no	2_42	安	03.10A.4	6	0
犠	0140	rejr	2_66	樂	03.10A.4	7	0
弟	1599	rjir	1_79	得1	03.10A.4	8	0
視	0749	phji	1_11	使1	03.10A.4	9	0
尢	3017	dji.j	1_61	類	03.10A.4	10	0
趨	1136	gu	2_01	中	03.10A.4	11	0
峡	0218	.jiij	1_39	平	03.10A.4	12	0
哘	2748	tɕhja	2_16	德	03.10A.4	13	0
溪	3844	dʑji.j	1_61	行	03.10A.4	14	0
視	0749	phji	1_11	使1	03.10A.4	15	0
貼	1643	xwã	1_24	桓	03.10A.5	1	0
虻	5306	dzjwɨ	1_30	帝	03.10A.5	2	0
紗	0819	rjar	1_82	殊	03.10A.5	3	0
貨	5531	gjij	1_36	奇	03.10A.5	4	0
喋	1519	ɣu	1_04	換	03.10A.5	5	0
奸	2931	sej	1_33	算	03.10A.5	6	0
紳	1084	ɣa.	2_56	十	03.10A.5	7	0
妾	0966	khjɨ	2_28	萬	03.10A.5	8	0
属	1348	sa	1_17	緡	03.10A.5	9	0
梯	1604	dzjɨj	1_42	錢	03.10A.5	10	0
笄	4342	dja	2_17	D1	03.10A.5	11	0
迅	1105	khjow	1_56	賜	03.10A.5	12	0
佶	2503	ku.	1_55	後	03.10A.5	13	0
温	5493	xã	2_22	漢	03.10A.5	14	0
弋	3139	ɕjij	1_35	代	03.10A.5	15	0
假	2541	dzjwo	2_44	人	03.10A.6	1	0
攻	0508	ŋwu	2_01	是	03.10A.6	2	0
郁	5354	thjɨ	2_28	此	03.10A.6	3	0
税	1183	da.	2_56	事	03.10A.6	4	0
璃	2460	sə	1_27	司	03.10A.6	5	0
咢	2736	biaa	2_20	馬	03.10A.6	6	0
貉	5119	pjɨr	1_86	彪	03.10A.6	7	0
墾	0586	sju	2_03	續	03.10A.6	8	0
温	5493	xã	2_22	漢	03.10A.6	9	0
弋	3139	ɕjij	1_35	代	03.10A.6	10	0
蔡	4797	.jwɨr	2_77	文	03.10A.6	11	0
計	5993	kha	1_17	中	03.10A.6	12	0
赫	5612	tshjiij	1_39	說1	03.10A.6	13	0
世	1148	ʑjĩ	1_16	任	03.10A.7	1	0
惺	3237	tshow	1_54	座	03.10A.7	2	0
袙	4962	.we	2_07	魏	03.10A.7	3	0
妲	2937	lhji.j	0	國	03.10A.7	4	0
假	2541	dzjwo	2_44	人	03.10A.7	5	0
攻	0508	ŋwu	2_01	是	03.10A.7	6	0
堋	2872	.wẽ	1_15	文	03.10A.7	7	0
揄	3379	xew	1_43	侯	03.10A.7	8	0
棘	3583	tja	1_20	者	03.10A.7	9	0
朞	3508	bji	2_10	臣	03.10A.7	10	0
杉	1139	.jij	1_36	P.	03.10A.7	11	0
復	2082	.jɨr	1_86	問	03.10A.7	12	0
譲	1045	da.	2_56	曰	03.10A.7	13	0
弘	0502	zjɨɨr	1_92	寡	03.10A.7	14	0
鉱	0545	dʑjwu	1_02	人	03.10A.7	15	0
棘	3583	tja	1_20	者	03.10B.1	1	0
汗	5688	.wa	2_14	何	03.10B.1	2	0
偶	0290	sju	2_03	如	03.10B.1	3	0
虻	5306	dzjwɨ	1_30	君	03.10B.1	4	0
攻	0508	ŋwu	2_01	是	03.10B.1	5	0
組	1278	.jɨ	2_28	謂	03.10B.1	6	0
廖	3119	.ji	1_11	有1	03.10B.1	7	0
朞	3508	bji	2_10	臣	03.10B.1	8	0
譲	1045	da.	2_56	曰	03.10B.1	9	0
専	1220	dʑjwu	1_02	仁	03.10B.1	10	0
虻	5306	dzjwɨ	1_30	君	03.10B.1	11	0
攻	0508	ŋwu	2_01	是	03.10B.1	12	0
肅	4601	nja	2_17	2SG	03.10B.1	13	0
組	1278	.jɨ	2_28	謂	03.10B.1	14	0
計	5993	kha	1_17	中	03.10B.1	15	0
世	1148	ʑjĩ	1_16	任	03.10B.2	1	0
惺	3237	tshow	1_54	座	03.10B.2	2	0
譲	1045	da.	2_56	曰	03.10B.2	3	0
閥	1918	mji	1_11	不	03.10B.2	4	0
専	1220	dʑjwu	1_02	仁	03.10B.2	5	0
虻	5306	dzjwɨ	1_30	君	03.10B.2	6	0
肅	4601	nja	2_17	2SG	03.10B.2	7	0
組	1278	.jɨ	2_28	謂	03.10B.2	8	0
虻	5306	dzjwɨ	1_30	君	03.10B.2	9	0
譲	1045	da.	2_56	曰	03.10B.2	10	0
頃	0582	thjij	2_33	何	03.10B.2	11	0
悃	3211	sjo	2_44	云	03.10B.2	12	0
厶	2699	nwə	1_27	知	03.10B.2	13	0
肅	4601	nja	2_17	2SG	03.10B.2	14	0
組	1278	.jɨ	2_28	謂	03.10B.2	15	0
世	1148	ʑjĩ	1_16	任	03.10B.3	1	0
惺	3237	tshow	1_54	座	03.10B.3	2	0
閏	5402	khjij	2_33	奏	03.10B.3	3	0
譲	1045	da.	2_56	曰	03.10B.3	4	0
烱	3926	nja	2_17	汝	03.10B.3	5	0
剰	1030	tɕjow	1_56	中	03.10B.3	6	0
汨	3763	ɕja	1_25	山	03.10B.3	7	0
刮	2627	ljɨ.	2_61	地	03.10B.3	8	0
辷	5258	.io.	1_71	方	03.10B.3	9	0
嬉	0098	rjor	2_81	得2	03.10B.3	10	0
肅	4601	nja	2_17	2SG	03.10B.3	11	0
蚌	4861	zjo.	2_64	時	03.10B.3	12	0
卵	2447	ljo	2_44	弟	03.10B.3	13	0
浙	3798	tsəj	1_40	小	03.10B.3	14	0
杉	1139	.jij	1_36	P.	03.10B.3	15	0
慟	3266	dzju	2_03	主	03.10B.4	1	0
視	0749	phji	1_11	使1	03.10B.4	2	0
祖	1274	.wo	2_42	應	03.10B.4	3	0
計	5993	kha	1_17	中	03.10B.4	4	0
掴	1567	gji	2_10	子	03.10B.4	5	0
杉	1139	.jij	1_36	P.	03.10B.4	6	0
遭	1326	kjɨ	1_30	D1	03.10B.4	7	0
慟	3266	dzju	2_03	主	03.10B.4	8	0
翦	4568	phjo	2_44	使2	03.10B.4	9	0
肅	4601	nja	2_17	2SG	03.10B.4	10	0
亳	2484	nioow	1_57	故	03.10B.4	11	0
係	0322	tɕhjwo	1_48	故	03.10B.4	12	0
孤	0433	bju	1_03	P.	03.10B.4	13	0
閥	1918	mji	1_11	不	03.10B.4	14	0
専	1220	dʑjwu	1_02	仁	03.10B.4	15	0
攻	0508	ŋwu	2_01	是	03.10B.5	1	0
厶	2699	nwə	1_27	知	03.10B.5	2	0
噴	2098	ŋa	2_14	1SG	03.10B.5	3	0
組	1278	.jɨ	2_28	謂	03.10B.5	4	0
堋	2872	.wẽ	1_15	文	03.10B.5	5	0
揄	3379	xew	1_43	侯	03.10B.5	6	0
絛	4456	lji.j	2_54	大	03.10B.5	7	0
藷	0945	tshja.	1_64	怒	03.10B.5	8	0
冂	2590	.wjɨ	2_27	D1	03.10B.5	9	0
姦	5671	thjɨ	1_30	逐	03.10B.5	10	0
嫉	0795	rjɨr	2_77	D1	03.10B.5	11	0
竺	0787	kã	1_24	趕	03.10B.5	12	0
豕	5113	.wji	1_10	為1	03.10B.5	13	0
視	0749	phji	1_11	使1	03.10B.5	14	0
幎	3101	.ji.	2_60	復	03.10B.5	15	0
畑	1906	nioow	1_57	後	03.10B.6	1	0
儡	2574	thji	2_10	翟	03.10B.6	2	0
抵	1601	xow	1_54	璜	03.10B.6	3	0
杉	1139	.jij	1_36	P.	03.10B.6	4	0
笄	4342	dja	2_17	D1	03.10B.6	5	0
復	2082	.jɨr	1_86	問	03.10B.6	6	0
儡	2574	thji	2_10	翟	03.10B.6	7	0
抵	1601	xow	1_54	璜	03.10B.6	8	0
譲	1045	da.	2_56	曰	03.10B.6	9	0
専	1220	dʑjwu	1_02	仁	03.10B.6	10	0
虻	5306	dzjwɨ	1_30	帝	03.10B.6	11	0
攻	0508	ŋwu	2_01	是	03.10B.6	12	0
肅	4601	nja	2_17	2SG	03.10B.6	13	0
組	1278	.jɨ	2_28	謂	03.10B.6	14	0
虻	5306	dzjwɨ	1_30	帝	03.10B.6	15	0
譲	1045	da.	2_56	曰	03.10B.7	1	0
頃	0582	thjij	2_33	何	03.10B.7	2	0
悃	3211	sjo	2_44	云	03.10B.7	3	0
組	1278	.jɨ	2_28	謂	03.10B.7	4	0
孱	3027	ku.	2_51	答	03.10B.7	5	0
譲	1045	da.	2_56	曰	03.10B.7	6	0
朞	3508	bji	2_10	臣	03.10B.7	7	0
觴	5026	mji	1_11	聞1	03.10B.7	8	0
虻	5306	dzjwɨ	1_30	帝	03.10B.7	9	0
鈍	1771	sji.j	2_54	智	03.10B.7	10	0
超	1542	ku	1_01	故	03.10B.7	11	0
朞	3508	bji	2_10	臣	03.10B.7	12	0
佃	1569	twu.	1_58	直	03.10B.7	13	0
組	1278	.jɨ	2_28	謂	03.10B.7	14	0
世	1148	ʑjĩ	1_16	任	03.10B.7	15	0
惺	3237	tshow	1_54	座	03.11A.1	1	0
佃	1569	twu.	1_58	直	03.11A.1	2	0
譲	1045	da.	2_56	曰	03.11A.1	3	0
赫	5612	tshjiij	1_39	說1	03.11A.1	4	0
喬	5856	ɣa	2_14	P.	03.11A.1	5	0
仞	2492	dza	2_14	測	03.11A.1	6	0
超	1542	ku	1_01	故	03.11A.1	7	0
表	2019	thja	1_20	此	03.11A.1	8	0
孤	0433	bju	1_03	P.	03.11A.1	9	0
晃	0510	ŋwər	1_84	皇	03.11A.1	10	0
虻	5306	dzjwɨ	1_30	帝	03.11A.1	11	0
杉	1139	.jij	1_36	之	03.11A.1	12	0
懺	3294	mee	2_11	賢	03.11A.1	13	0
鈍	1771	sji.j	2_54	智	03.11A.1	14	0
攻	0508	ŋwu	2_01	是	03.11A.1	15	0
肅	4601	nja	2_17	2SG	03.11A.2	1	0
沢	1416	djwu	2_03	知	03.11A.2	2	0
噴	2098	ŋa	2_14	1SG	03.11A.2	3	0
組	1278	.jɨ	2_28	謂	03.11A.2	4	0
堋	2872	.wẽ	1_15	文	03.11A.2	5	0
揄	3379	xew	1_43	侯	03.11A.2	6	0
絛	4456	lji.j	2_54	大	03.11A.2	7	0
腮	4630	de	2_07	喜	03.11A.2	8	0
幎	3101	.ji.	2_60	復	03.11A.2	9	0
世	1148	ʑjĩ	1_16	任	03.11A.2	10	0
惺	3237	tshow	1_54	座	03.11A.2	11	0
杉	1139	.jij	1_36	P.	03.11A.2	12	0
桂	5981	.a	0	D1	03.11A.2	13	0
朏	3506	bji.j	1_61	升	03.11A.2	14	0
絛	4456	lji.j	2_54	大	03.11A.2	15	0
躡	5212	phji.	1_67	議	03.11A.3	1	0
事	0760	dzjɨj	2_37	判	03.11A.3	2	0
豕	5113	.wji	1_10	為1	03.11A.3	3	0
視	0749	phji	1_11	使1	03.11A.3	4	0
恍	3200	tɕhjiw	1_46	六	03.11A.3	5	0
妲	2937	lhji.j	0	國	03.11A.3	6	0
弋	3139	ɕjij	1_35	代	03.11A.3	7	0
假	2541	dzjwo	2_44	人	03.11A.3	8	0
攻	0508	ŋwu	2_01	是	03.11A.3	9	0
拂	3342	su	1_01	蘇	03.11A.4	1	0
砿	0546	.u	2_01	武	03.11A.4	2	0
畑	1906	nioow	1_57	後	03.11A.4	3	0
剳	2639	mjiij	2_35	名	03.11A.4	4	0
具	5925	tsə	1_27	子	03.11A.4	5	0
帑	3094	khjij	1_36	卿	03.11A.4	6	0
組	1278	.jɨ	2_28	謂	03.11A.4	7	0
啼	2780	kiow	2_48	江	03.11A.4	8	0
迹	5267	ljɨj	1_42	陵	03.11A.4	9	0
刮	2627	ljɨ.	2_61	地	03.11A.4	10	0
辷	5258	.io.	1_71	方	03.11A.4	11	0
假	2541	dzjwo	2_44	人	03.11A.4	12	0
攻	0508	ŋwu	2_01	是	03.11A.4	13	0
温	5493	xã	2_22	漢	03.11A.4	14	0
砿	0546	.u	2_01	武	03.11A.4	15	0
虻	5306	dzjwɨ	1_30	帝	03.11A.5	1	0
弋	3139	ɕjij	1_35	代	03.11A.5	2	0
捕	2149	dʑju	1_02	顯	03.11A.5	3	0
戦	1223	phjoo	2_46	合	03.11A.5	4	0
籟	4401	zow	2_47	持	03.11A.5	5	0
視	0749	phji	1_11	使1	03.11A.5	6	0
署	0942	lja.	1_64	北	03.11A.5	7	0
[truncated: 20,941 more rows]
